# Supplementary material for: Cu-catalyzed C–H amination/Ullmann N-arylation domino reaction: a straightforward synthesis of 9,14-diaryl-9,14-dihydrodibenzo[a,c]phenazine
Source: Royal Society of Chemistry journal article supplement (doi:10.1039/c6cc01569g), 2016-01-01
Supplement: c6cc01569g1.pdf [file c6cc01569g1.pdf]

## Supporting Information

### **Cu-Catalyzed C-H Amination/Ullmann *N*-Arylation Domino Reaction: Straightforward Synthesis of 9,14-Diaryl-9,14- dihydrodibenzo[*a,c*]phenazine**

Huan Wang, Zhiyun Zhang, Haitao Zhou, Tonghai Wang, Jianhua Su,\* Xiaofeng  
Tong\* and He Tian

#### Table of Content

|                                                       |            |
|-------------------------------------------------------|------------|
| <b>I. General Information .....</b>                   | <b>S2</b>  |
| <b>II. The Data and NMR Spectra of Products .....</b> | <b>S3</b>  |
| <b>III. The X-ray Analysis .....</b>                  | <b>S33</b> |

## I. General Information

Unless otherwise noted, all reagents were obtained commercially available and used without further purification.

NMR spectrum:  $^1\text{H}$  and  $^{13}\text{C}$  NMR spectra were collected on 400 MHz and 300 MHz NMR spectrometers (Bruker AVANCE) using  $\text{CDCl}_3$  or  $\text{DMSO-d}_6$ . Chemical shifts are reported in parts per million (ppm). Chemical shifts for protons are reported in parts per million downfield and are referenced to residual protium in the NMR solvent ( $\text{CHCl}_3 = \delta 7.26$ ). Chemical shifts for carbon are reported in parts per million downfield and are referenced to the carbon resonances of the solvent ( $\text{CDCl}_3 = \delta 77.0$ ). Data are represented as follows: chemical shift, multiplicity (br. s = broad, s = singlet, d = doublet, t = triplet, q = quartet, m = multiplet), coupling constants in Hertz (Hz), integration.

Mass spectroscopy: Mass spectra were in general recorded on an AMD 402/3 or a HP 5989A mass selective detector.

Column Chromatography: Column chromatography was performed with silica gel (200-300 mesh ASTM).

## II. The Data and NMR Spectra of Products

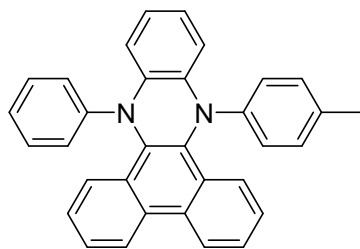

### 11-methyl-9,14-diphenyl-9,14-dihydrodibenzo[a,c]phenazine (1aa)

m.p. 183-185 °C;  $^1\text{H}$  NMR (400 MHz,  $\text{CDCl}_3$ )  $\delta$ : 8.68 (d,  $J = 8.0$  Hz, 2H), 8.07-8.12 (m, 2H), 7.68-7.73 (m, 2H), 7.46-7.61 (m, 4H), 7.21-7.29 (m, 2H), 6.92-7.03 (m, 6H), 6.75-6.82 (m, 3H), 2.12 (s, 3H);  $^{13}\text{C}$  NMR (100 MHz,  $\text{CDCl}_3$ )  $\delta$ : 148.04, 145.42, 145.31, 144.20, 138.30, 137.47, 131.02, 130.01, 129.79, 129.57, 129.47, 128.82, 127.45, 127.02, 126.89, 126.70, 126.44, 126.39, 125.49, 125.02, 124.68, 124.57, 123.03, 120.85, 118.14, 116.50, 20.52; HRMS ESI ( $m/z$ )  $[\text{M}]^+$ : calcd. for  $\text{C}_{33}\text{H}_{24}\text{N}_2$  448.1939, found 448.1938.

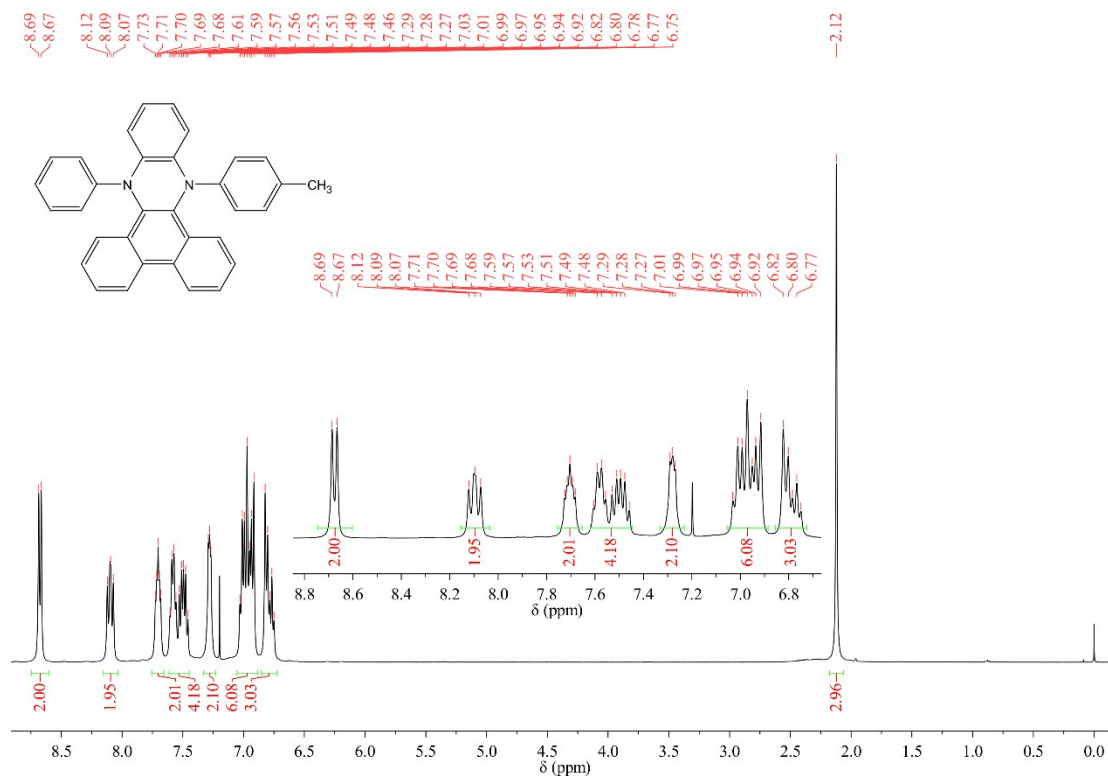

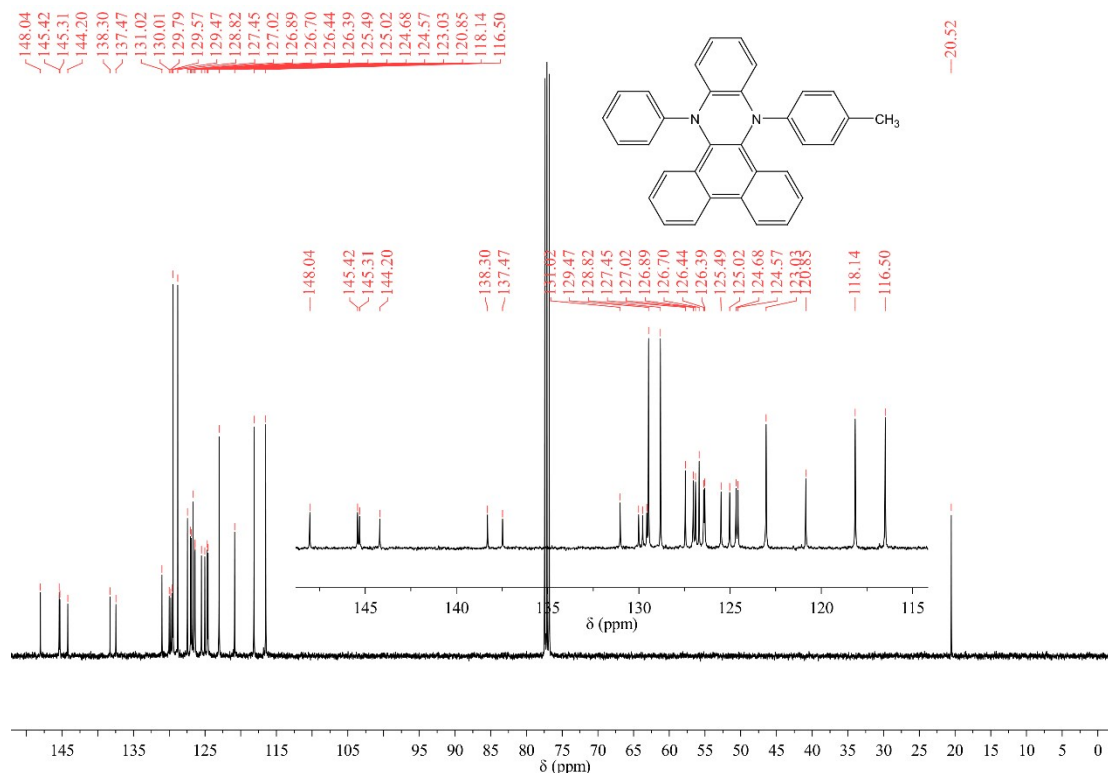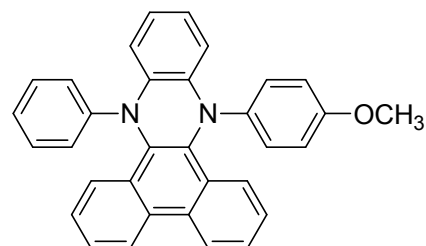

### 11-methoxy-9,14-diphenyl-9,14-dihydrodibenzo[a,c]phenazine (1ab)

m.p. 138-140 °C; <sup>1</sup>H NMR (400 MHz, CDCl<sub>3</sub>) δ: 8.71 (d, *J* = 8.4 Hz, 2H), 8.15 (d, *J* = 8.0 Hz, 1H), 8.09 (d, *J* = 8.4 Hz, 1H), 7.67-7.71 (m, 2H), 7.54-7.65 (m, 3H), 7.47-7.52 (m, 1H), 7.28-7.31 (m, 2H), 7.03-7.06 (m, 4H), 6.94 (d, *J* = 8.0 Hz, 2H), 6.79-6.82 (m, 1H), 6.60-6.62 (m, 2H), 3.66 (s, 3H); <sup>13</sup>C NMR (100 MHz, CDCl<sub>3</sub>) δ: 155.18, 148.44, 145.78, 143.38, 141.53, 138.44, 136.62, 130.07, 129.58, 129.55, 129.28, 128.74, 127.53, 127.00, 126.72, 126.29, 126.18, 125.62, 125.56, 124.62, 124.51, 124.39, 122.95, 122.89, 121.39, 120.62, 116.08, 114.16, 55.36; HRMS ESI (*m/z*) [M]<sup>+</sup>: calcd. for C<sub>33</sub>H<sub>24</sub>N<sub>2</sub>O 464.1889, found 464.1890.

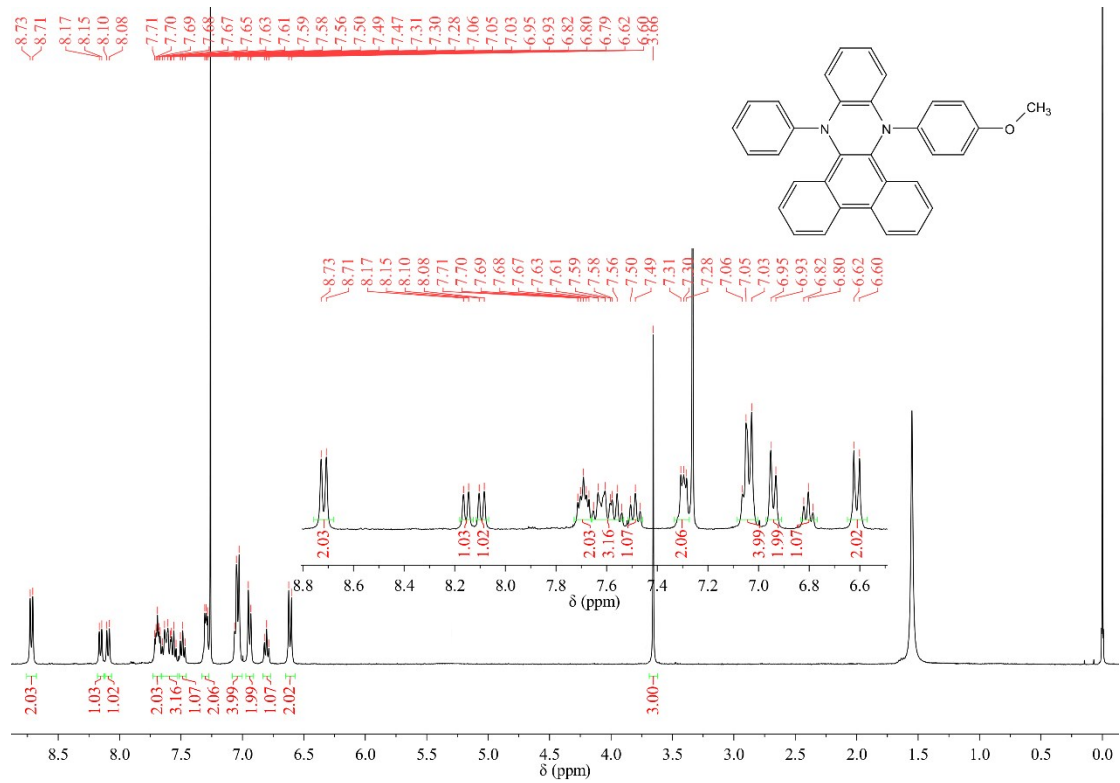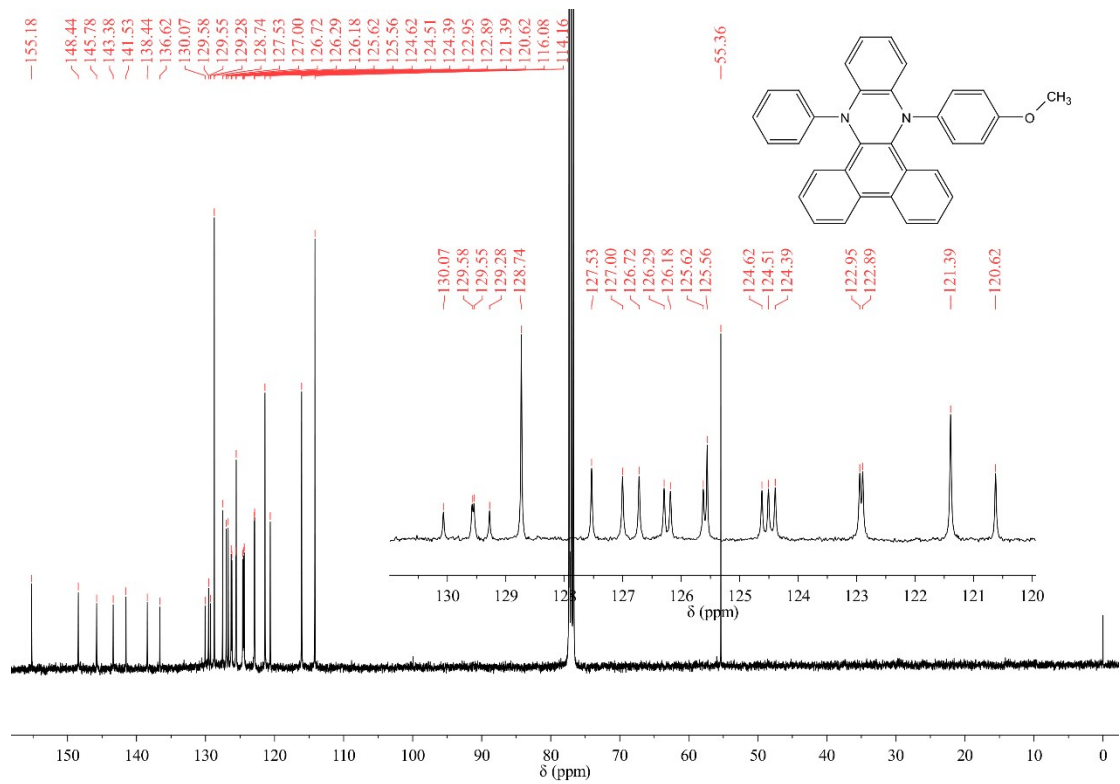

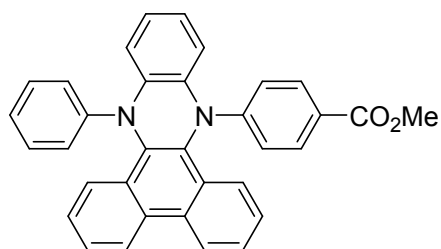

**methyl 4-(14-phenyldibenzo[a,c]phenazin-9(14H)-yl)benzoate (1ac)**

m.p. 182-185 °C;  $^1\text{H}$  NMR (400 MHz,  $\text{CDCl}_3$ )  $\delta$ : 8.74-8.77 (m, 2H), 8.09-8.11 (m, 1H), 8.03-8.06 (m, 1H), 7.79-7.82 (m, 1H), 7.73-7.75 (m, 1H), 7.65-7.70 (m, 4H), 7.52-7.60 (m, 2H), 7.37-7.40 (m, 2H), 6.96-7.03 (m, 4H), 6.89-6.91 (m, 2H), 6.77-6.81 (m, 1H), 3.78 (s, 3H);  $^{13}\text{C}$  NMR (100 MHz,  $\text{CDCl}_3$ )  $\delta$ : 166.94, 151.03, 147.07, 145.26, 143.49, 138.87, 137.13, 130.71, 130.11, 129.79, 129.22, 128.94, 128.87, 127.77, 127.46, 127.21, 127.07, 126.90, 126.77, 126.12, 125.39, 124.76, 124.24, 123.19, 123.09, 121.59, 121.48, 116.99, 114.18, 51.65; HRMS ESI ( $m/z$ )  $[\text{M}]^+$ : calcd. for  $\text{C}_{34}\text{H}_{24}\text{N}_2\text{O}_2$  492.1838, found 492.1836.

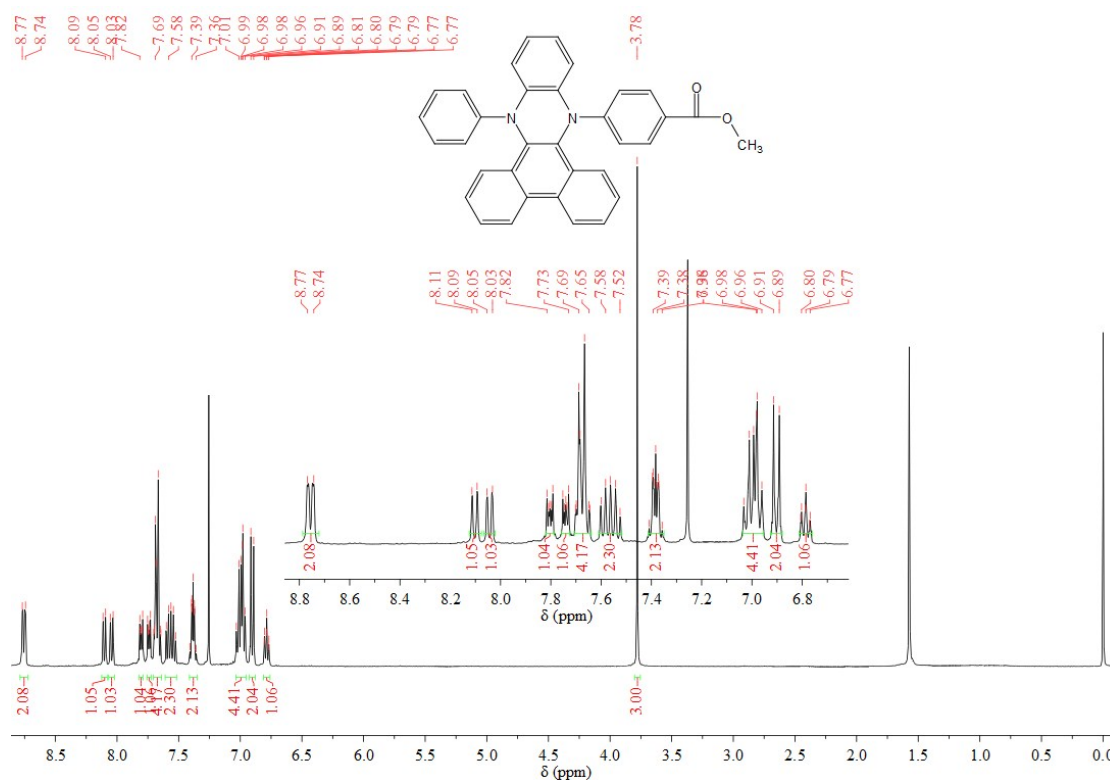

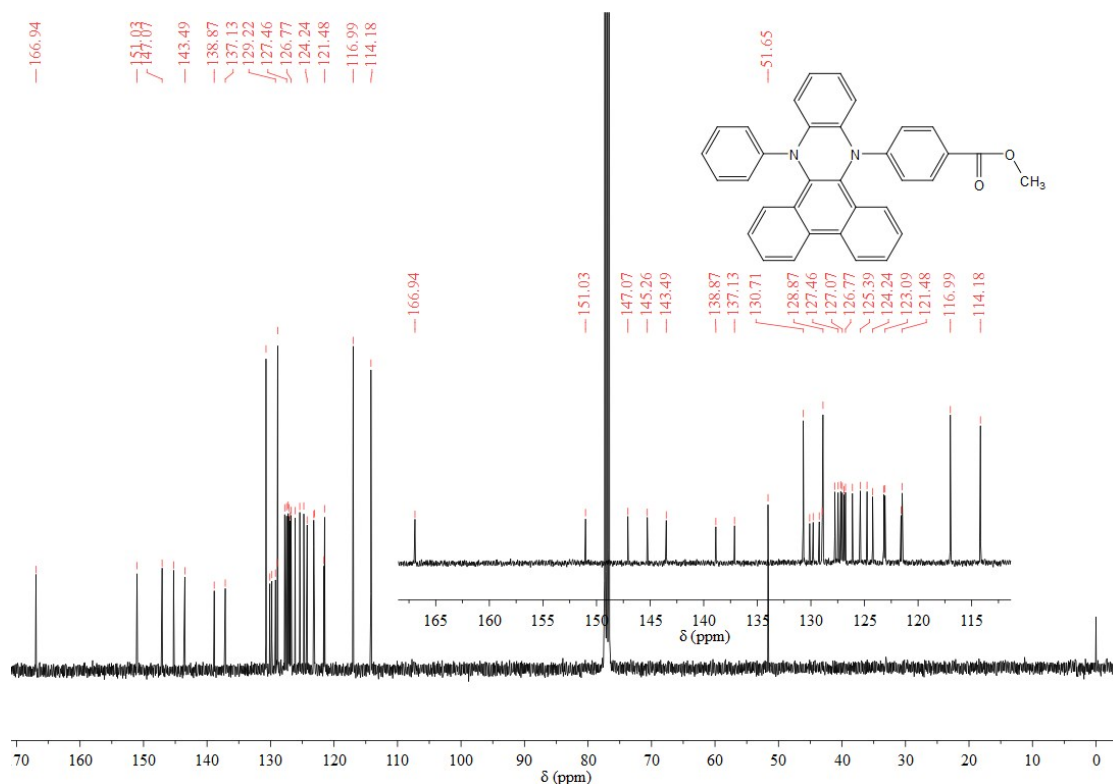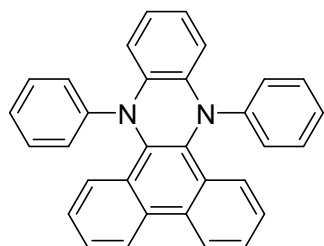

### 9,14-diphenyl-9,14-dihydrodibenzo[a,c]phenazine (1ad)

m.p. 241-243 °C; <sup>1</sup>H NMR (400 MHz, CDCl<sub>3</sub>) δ: 8.74 (d, *J* = 8.0 Hz, 2H), 8.12 (d, *J* = 8.0 Hz, 2H), 7.74-7.76 (m, 2H), 7.63-7.67 (m, 2H), 7.52-7.56 (m, 2H), 7.33-7.35 (m, 2H), 6.96-7.04 (m, 8H), 6.76-6.80 (m, 2H); <sup>13</sup>C NMR (100 MHz, CDCl<sub>3</sub>) δ: 147.69, 144.83, 138.13, 129.88, 129.48, 128.76, 127.39, 126.98, 126.51, 125.37, 124.61, 123.02, 121.02, 116.76; HRMS ESI (*m/z*) [M+H]<sup>+</sup>: calcd. for C<sub>32</sub>H<sub>23</sub>N<sub>2</sub> 435.1861, found 435.1851.

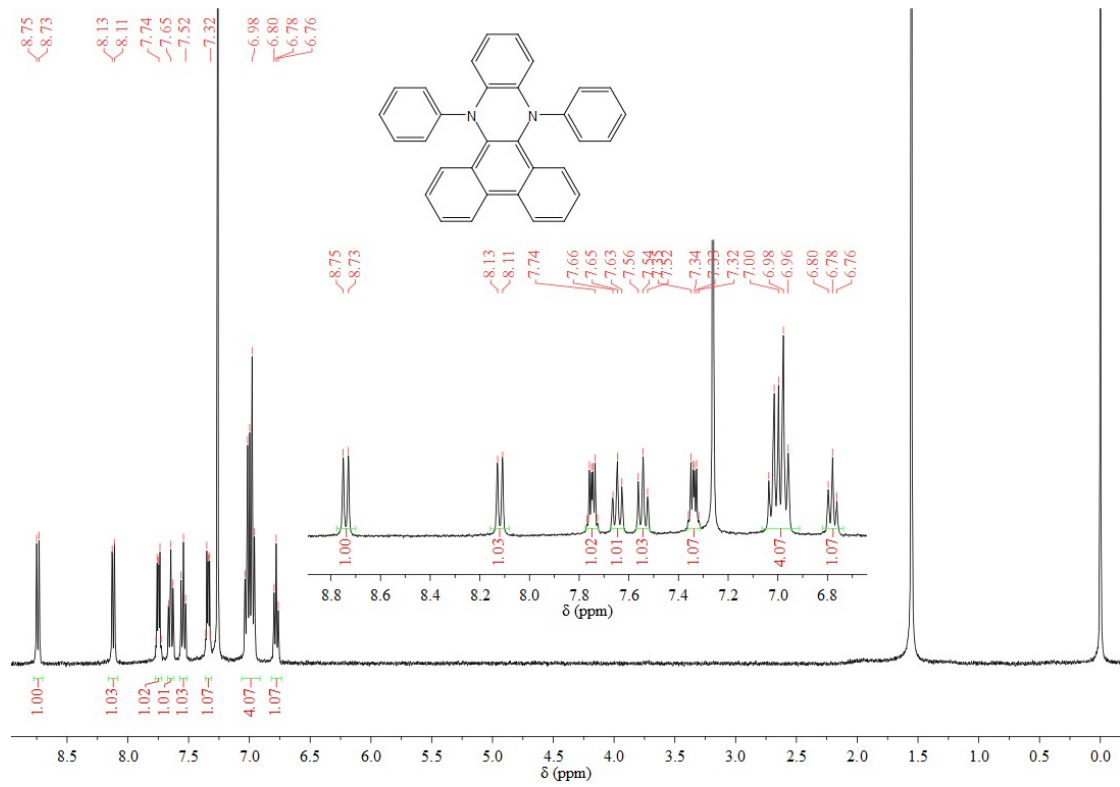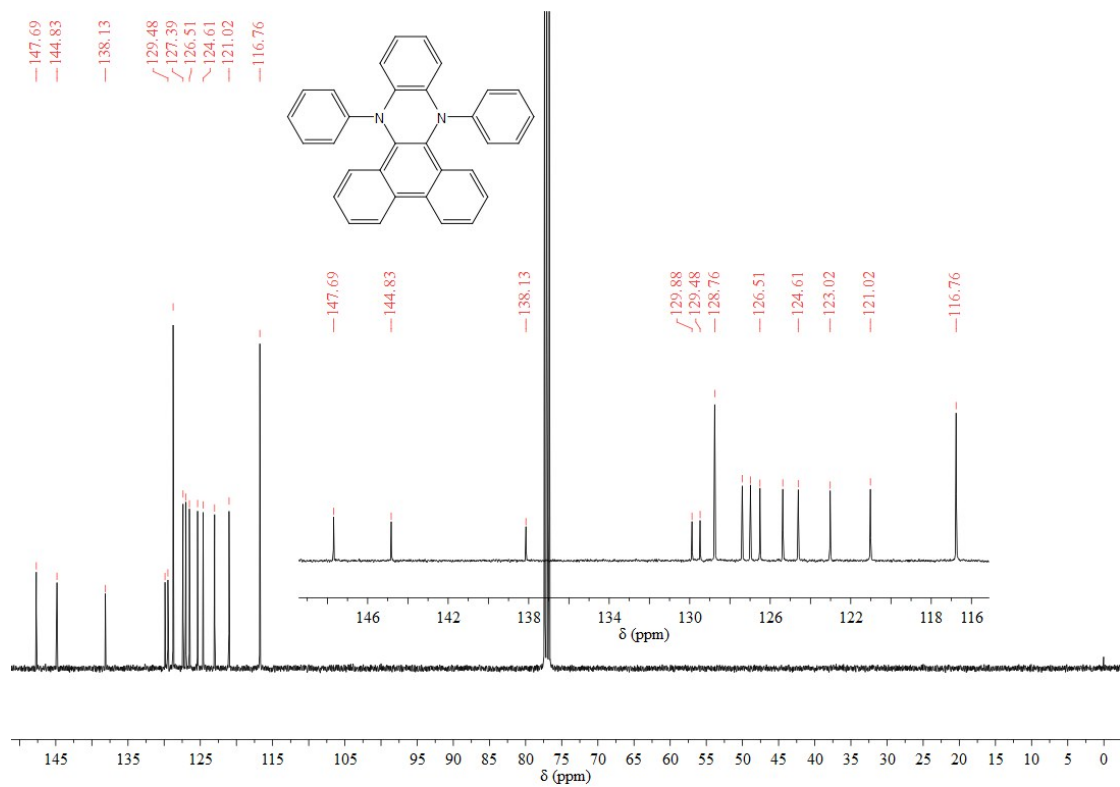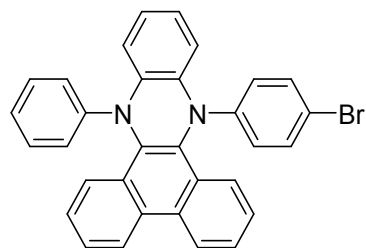



**9-(4-bromophenyl)-14-phenyl-9,14-dihydrodibenzo[a,c]phenazine (1ae)**

m.p. 188-189 °C; <sup>1</sup>H NMR (400 MHz, DMSO) δ: 8.95 (d, *J* = 8.4 Hz, 2H), 8.02-7.86 (m, 4H), 7.78-7.58 (m, 4H), 7.50-7.39 (m, 2H), 7.22 (d, *J* = 9.1 Hz, 2H), 7.14-7.05 (m, 2H), 7.01 (d, *J* = 7.8 Hz, 2H), 6.91-6.81 (m, 3H); <sup>13</sup>C NMR (100 MHz, CDCl<sub>3</sub>) δ 147.35, 146.69, 144.95, 144.22, 138.43, 137.50, 131.49, 129.94, 129.84, 129.29, 129.06, 128.84, 127.43, 127.10, 127.03, 126.70, 126.64, 125.72, 125.41, 124.65, 124.26, 123.11, 123.02, 121.25, 117.68, 116.71, 113.13; HRMS ESI (*m/z*) [M+H]<sup>+</sup>: calcd. for C<sub>32</sub>H<sub>22</sub>N<sub>2</sub>Br 513.0966, found 513.0968.

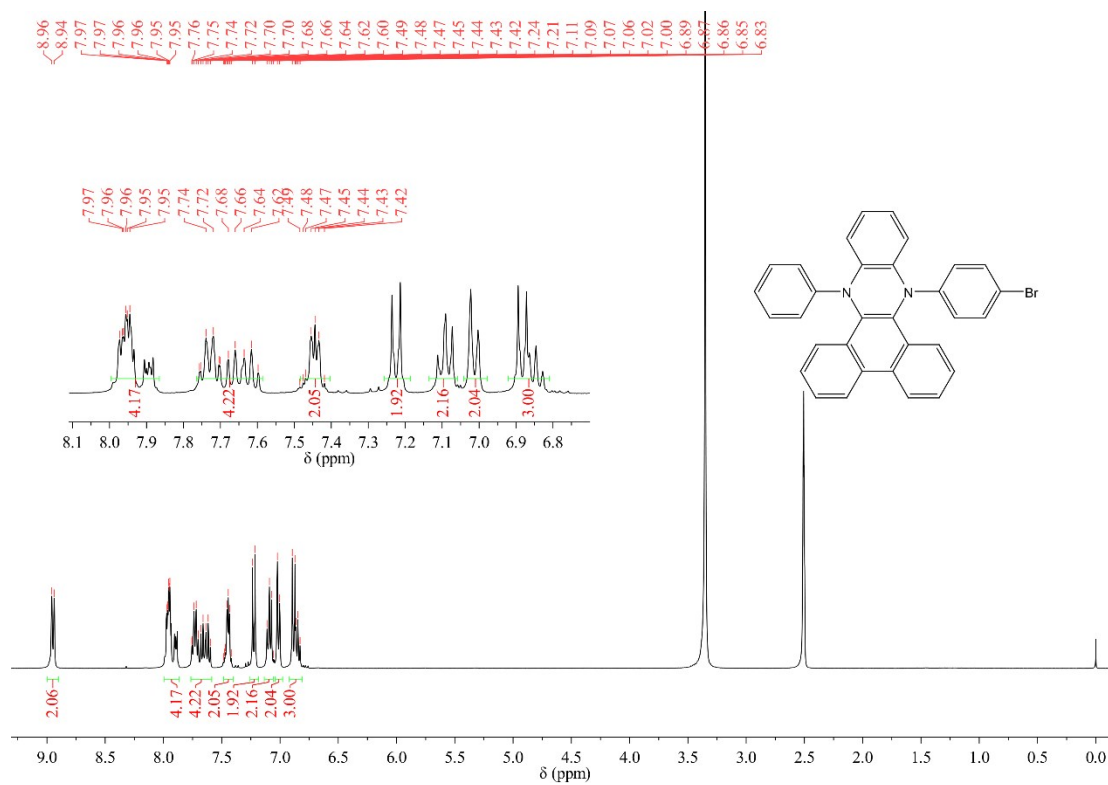

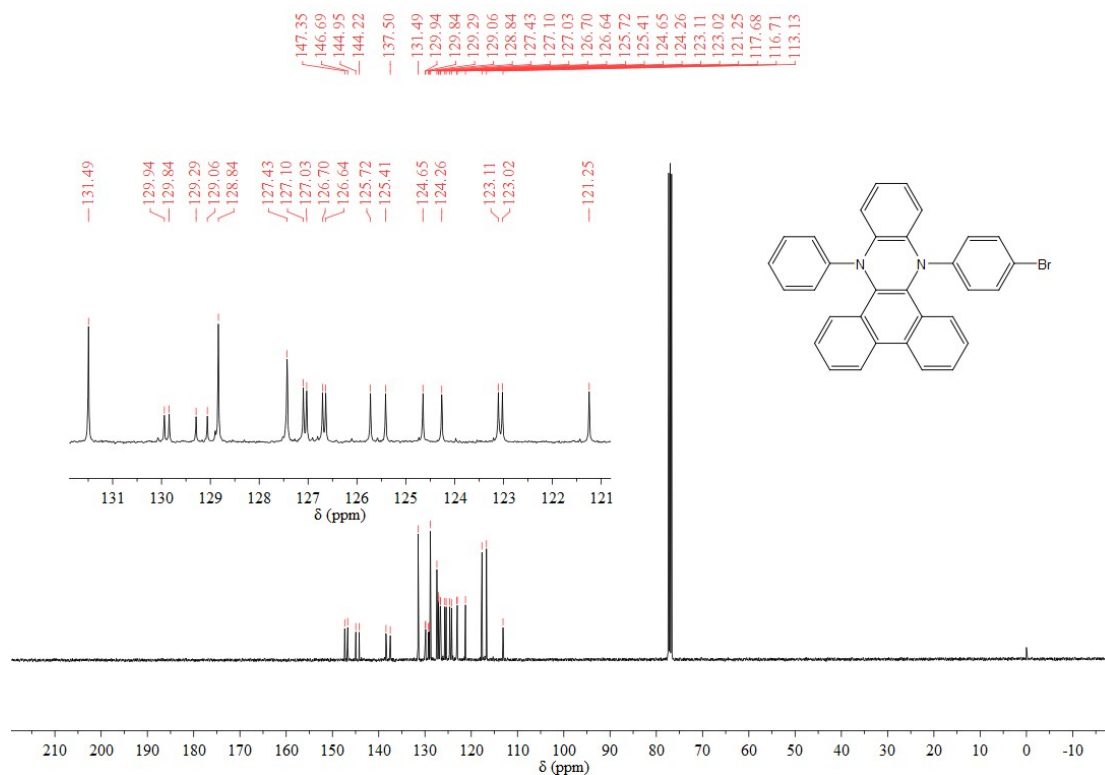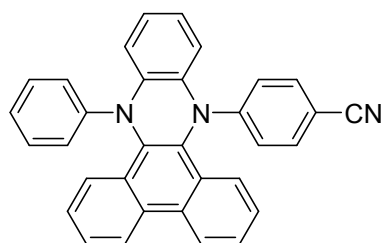

#### 4-(14-phenyldibenzo[a,c]phenazin-9(14H)-yl)benzocyanide (**1ae**)

m.p. 231-231 °C;  $^1\text{H}$  NMR (400 MHz,  $\text{DMSO}-d_6$ )  $\delta$ : 8.97-9.00 (m, 2H), 8.02-8.04 (m, 1H), 7.93-7.97 (m, 3H), 7.69-7.80 (m, 3H), 7.61-7.65 (m, 1H), 7.48-7.52 (m, 4H), 7.08-7.11 (m, 2H), 7.02-7.04 (m, 2H), 6.93-6.96 (m, 2H), 6.84-6.88 (m, 1H);  $^{13}\text{C}$  NMR (100 MHz,  $\text{CDCl}_3$ )  $\delta$ : 150.76, 146.89, 145.35, 142.97, 139.15, 136.64, 133.09, 130.19, 129.81, 129.11, 128.95, 128.68, 127.74, 127.64, 127.44, 127.22, 127.17, 126.97, 126.56, 125.56, 124.85, 123.91, 123.36, 123.16, 121.73, 119.72, 117.00, 114.73, 102.52.; HRMS ESI ( $m/z$ )  $[\text{M}+\text{H}]^+$ : calcd. for  $\text{C}_{33}\text{H}_{22}\text{N}_3$  460.1814, found 460.1813.



**9-(naphthalen-1-yl)-14-phenyl-9,14-dihydrodibenzo[a,c]phenazine (1ag)**

m.p. 215-218 °C; <sup>1</sup>H NMR (400 MHz, CDCl<sub>3</sub>) δ: 8.66-8.70 (m, 2H), 8.61-8.63 (d, *J* = 8.4 Hz, 1H), 8.32-8.35 (m, 1H), 7.88-7.91 (m, 2H), 7.74-7.76 (d, *J* = 8.0 Hz, 1H), 7.61-7.64 (m, 3H), 7.43-7.56 (m, 4H), 7.17-7.26 (m, 3H), 7.03-7.14 (m, 4H), 6.87-6.91 (m, 3H); <sup>13</sup>C NMR (100 MHz, CDCl<sub>3</sub>) δ: 150.28, 146.61, 143.84, 139.38, 138.30, 135.07, 132.53, 131.41, 130.29, 130.15, 128.94, 128.62, 127.96, 127.88, 127.35, 127.21, 126.69, 126.29, 126.06, 125.90, 125.78, 125.30, 124.20, 123.87, 123.48, 123.12, 122.78, 120.28, 120.11, 115.14; HRMS ESI (*m/z*) [M+H]<sup>+</sup>: calcd. for C<sub>36</sub>H<sub>25</sub>N<sub>2</sub> 485.2018, found 485.2011.

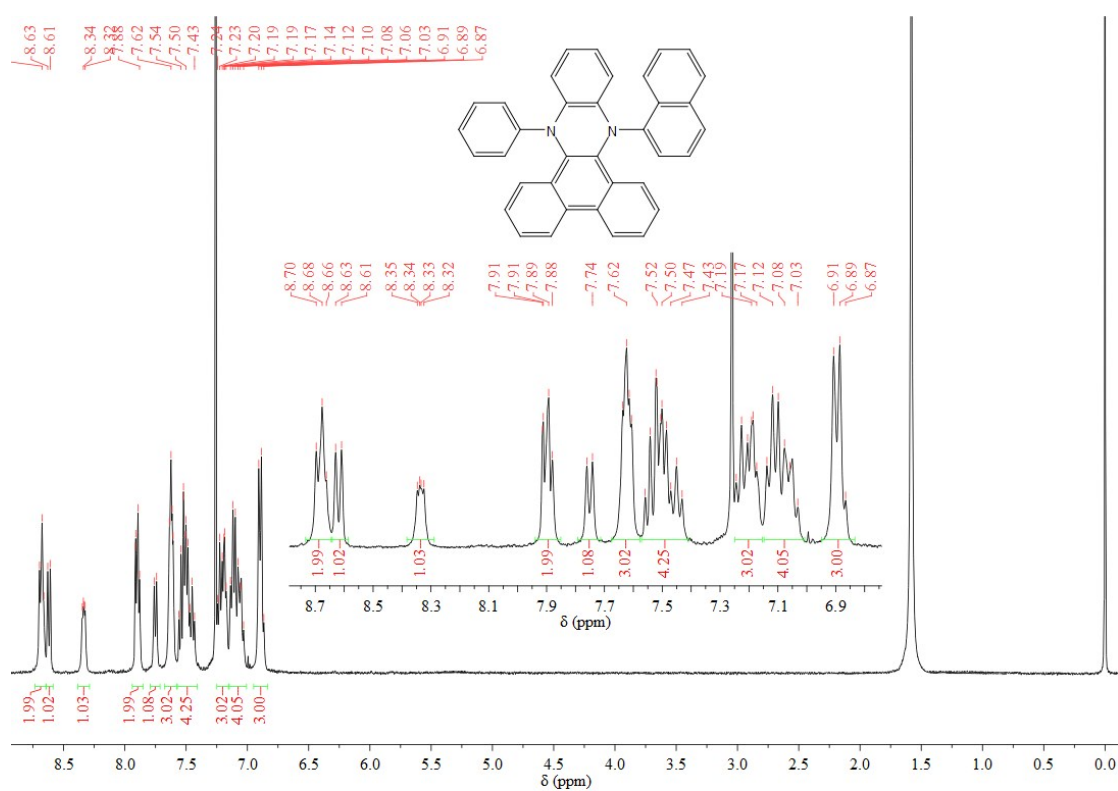

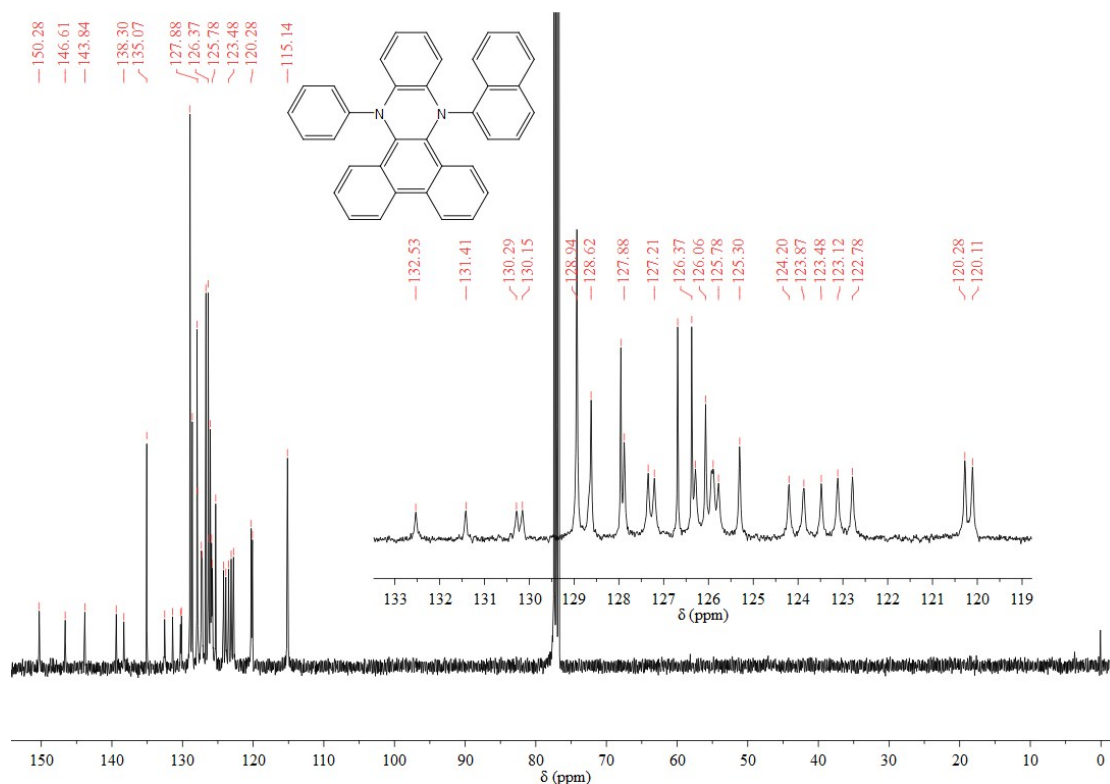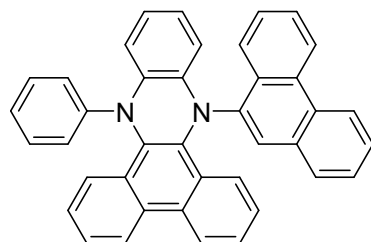

**9-(phenanthren-9-yl)-14-phenyl-9,14-dihydrodibenzo[a,c]phenazine (1ah)**

m.p. 282-285 °C;  $^1\text{H}$  NMR (400 MHz,  $\text{CDCl}_3$ )  $\delta$ : 8.96-8.98 (m, 1H), 8.76-8.78 (m, 1H), 8.69-8.71 (d,  $J=8.4$  Hz, 2H), 8.61-8.63 (d,  $J=8.4$  Hz, 1H), 8.40-8.42(m, 1H), 8.09-8.11 (d,  $J=8.4$  Hz, 1H), 7.74-7.79 (m, 2H), 7.52-7.67 (m, 5H), 7.33-7.48 (m, 3H), 7.03-7.22 (m, 6H), 6.92-7.00 (m, 3H);  $^{13}\text{C}$  NMR (100 MHz,  $\text{CDCl}_3$ )  $\delta$ : 150.90, 147.07, 142.91, 140.10, 139.42, 132.94, 132.02, 131.85, 131.51, 130.23, 129.60, 128.99, 128.57, 128.15, 127.59, 127.39, 127.10, 126.94, 126.82, 126.38, 125.99, 124.24, 123.89, 123.36, 123.09, 122.83, 122.35, 120.86, 120.36, 115.33; HRMS ESI ( $m/z$ )  $[\text{M}+\text{H}]^+$ : calcd. for  $\text{C}_{40}\text{H}_{27}\text{N}_2$  535.2174, found 535.2175.

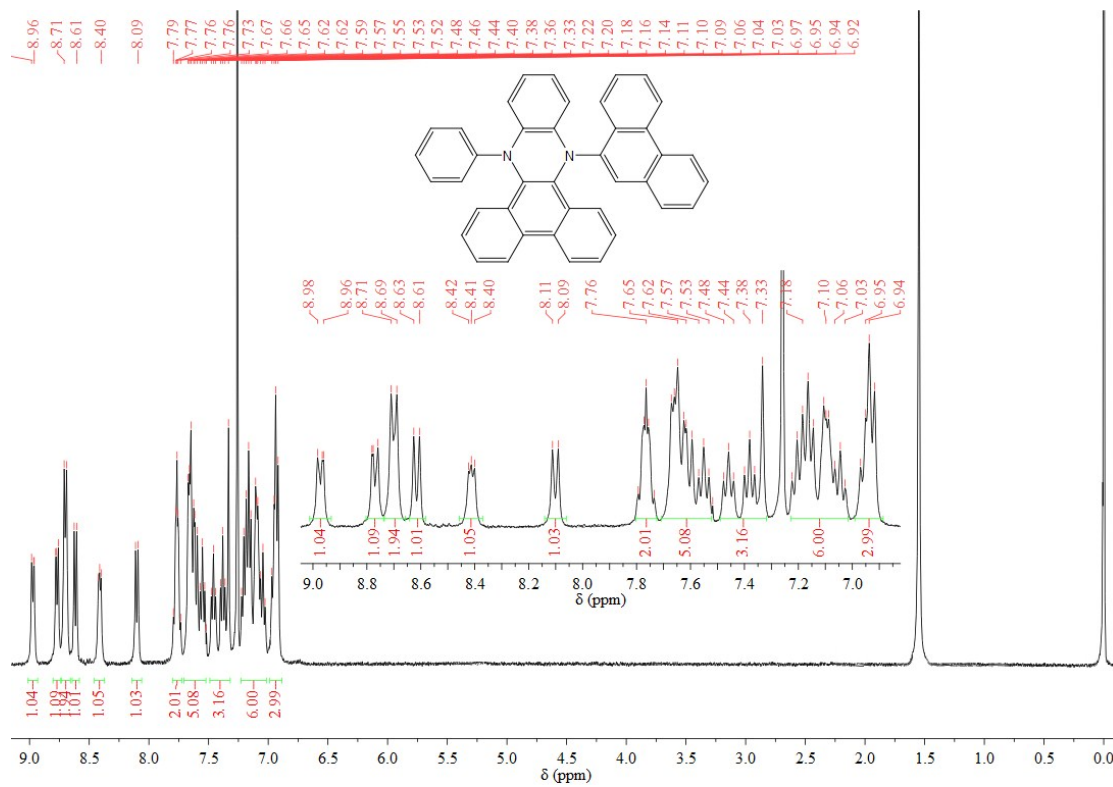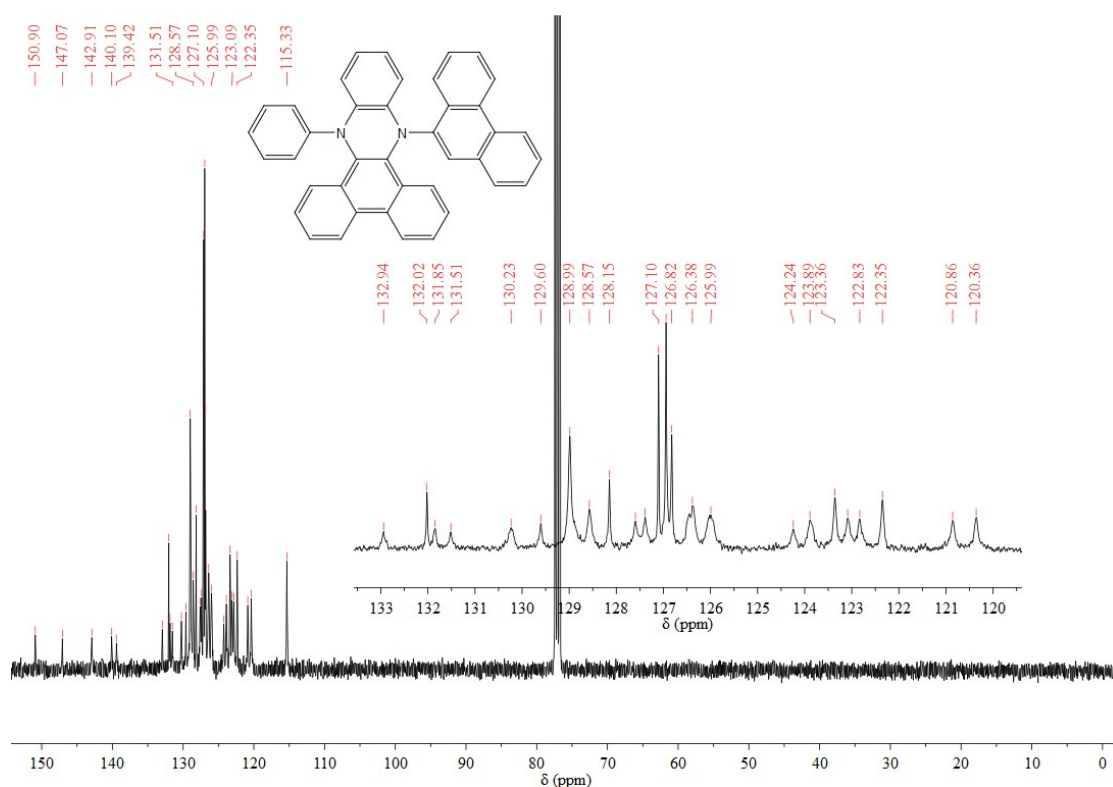

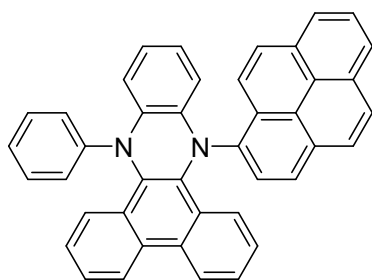

**9-phenyl-14-(pyren-1-yl)-9,14-dihydrodibenzo[a,c]phenazine (1ai)**

m.p. 324-326 °C;  $^1\text{H}$  NMR (400 MHz,  $\text{CDCl}_3$ )  $\delta$ : 8.89-8.91 (d,  $J=9.2$  Hz, 1H), 8.68-8.70 (d,  $J=8.0$  Hz, 2H), 8.38-8.40 (m, 1H), 8.22-8.26 (t,  $J=8.0$  Hz, 2H), 8.17-8.19 (d,  $J=8.4$  Hz, 1H), 8.04-8.08 (m, 2H), 7.93-7.97 (m, 2H), 7.85-7.87 (d,  $J=8.0$  Hz, 1H), 7.64-7.66 (m, 4H), 7.57-7.59 (d,  $J=8.0$  Hz, 1H), 7.39-7.43 (t,  $J=7.6$  Hz, 1H), 7.15-7.21 (m, 3H), 6.92-7.01 (m, 5H);  $^{13}\text{C}$  NMR (100 MHz,  $\text{CDCl}_3$ )  $\delta$ : 150.43, 146.93, 141.34, 139.21, 138.40, 131.82, 131.26, 131.01, 130.45, 130.31, 130.15, 129.62, 129.07, 128.97, 128.79, 128.38, 127.96, 127.67, 127.36, 127.27, 127.18, 126.40, 126.35, 125.95, 125.91, 125.83, 125.81, 125.76, 125.46, 124.76, 124.48, 124.26, 123.92, 123.50, 123.09, 122.79, 120.37, 120.25, 115.26; HRMS ESI ( $m/z$ ) [ $\text{M}$ ] $^+$ : calcd. for  $\text{C}_{42}\text{H}_{26}\text{N}_2$  558.2096, found 558.2095.

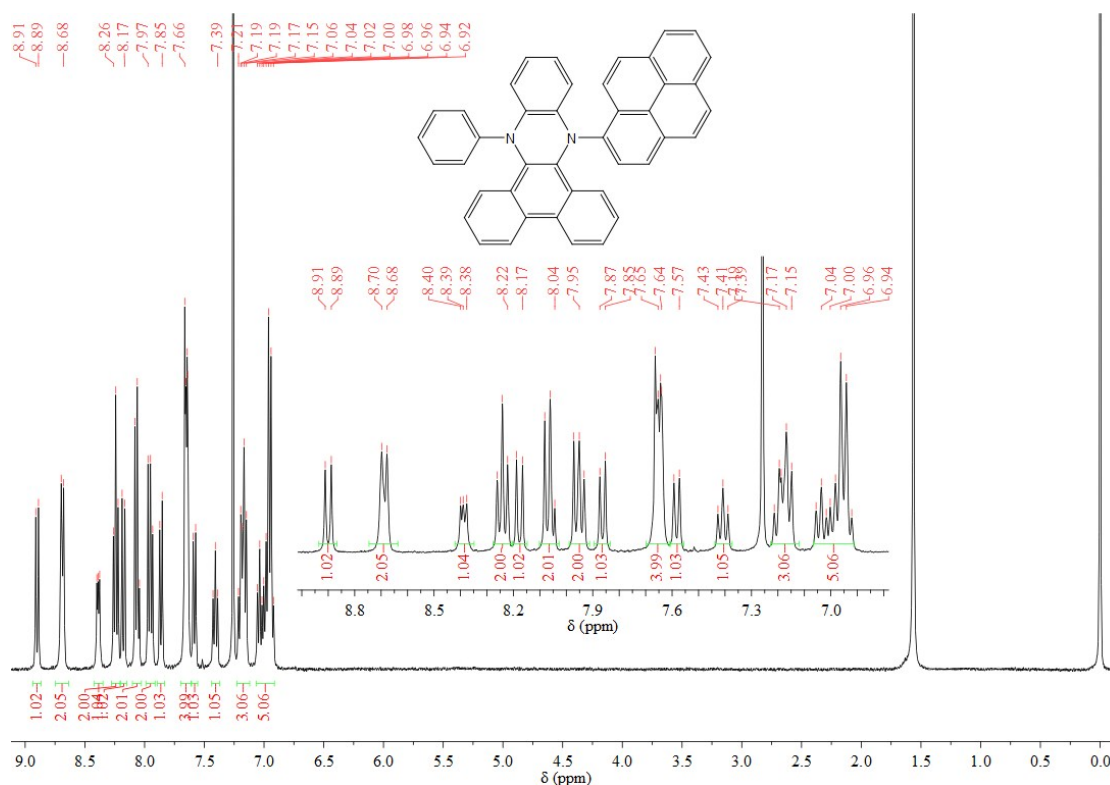

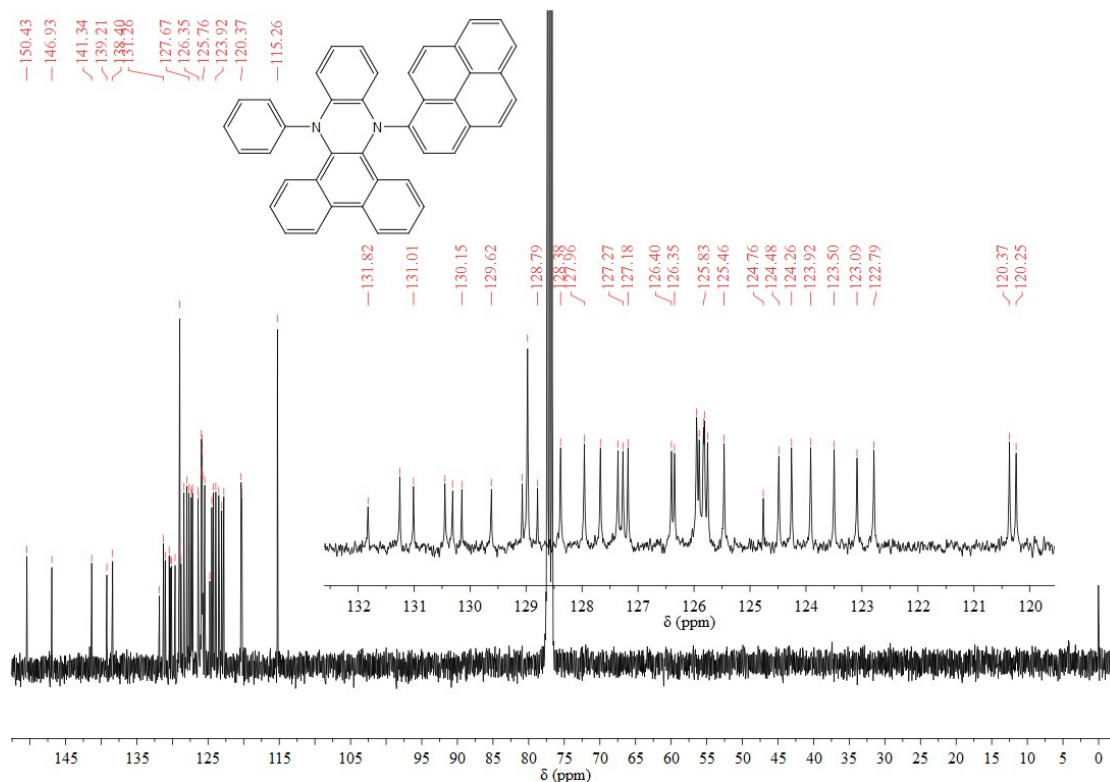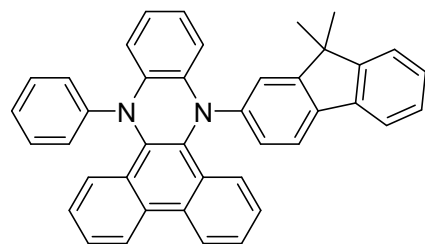

**9-(9,9-dimethyl-9H-fluoren-2-yl)-14-phenyl-9,14-dihydrodibenzo[a,c]phenazine**

**(1aj)**

m.p. 226-228 °C;  $^1\text{H}$  NMR (400 MHz,  $\text{DMSO}-d_6$ )  $\delta$ : 8.95 (d,  $J = 8.0$  Hz, 2H), 7.99-8.05 (m, 3H), 7.87-7.90 (m, 1H), 7.55-7.75 (m, 6H), 7.37-7.45 (m, 3H), 7.16-7.26 (m, 3H), 7.06-7.10 (m, 3H), 6.98-7.01 (d,  $J = 8.0$  Hz, 2H), 6.80 (t,  $J = 7.2$  Hz, 1H), 1.10 (s, 6H);  $^{13}\text{C}$  NMR (100 MHz,  $\text{CDCl}_3$ )  $\delta$ : 154.63, 153.32, 148.16, 147.59, 145.60, 144.58, 139.03, 138.71, 137.89, 132.96, 129.96, 129.84, 129.66, 129.45, 128.75, 127.70, 127.07, 126.86, 126.80, 126.52, 126.47, 126.10, 125.60, 125.22, 124.62, 124.57, 123.00, 122.31, 120.85, 120.20, 119.17, 117.24, 116.34, 112.70, 46.61, 26.89; HRMS ESI ( $m/z$ ) [ $\text{M}$ ] $^+$ : calcd. for  $\text{C}_{41}\text{H}_{30}\text{N}_2$  550.2409, found 550.2407.



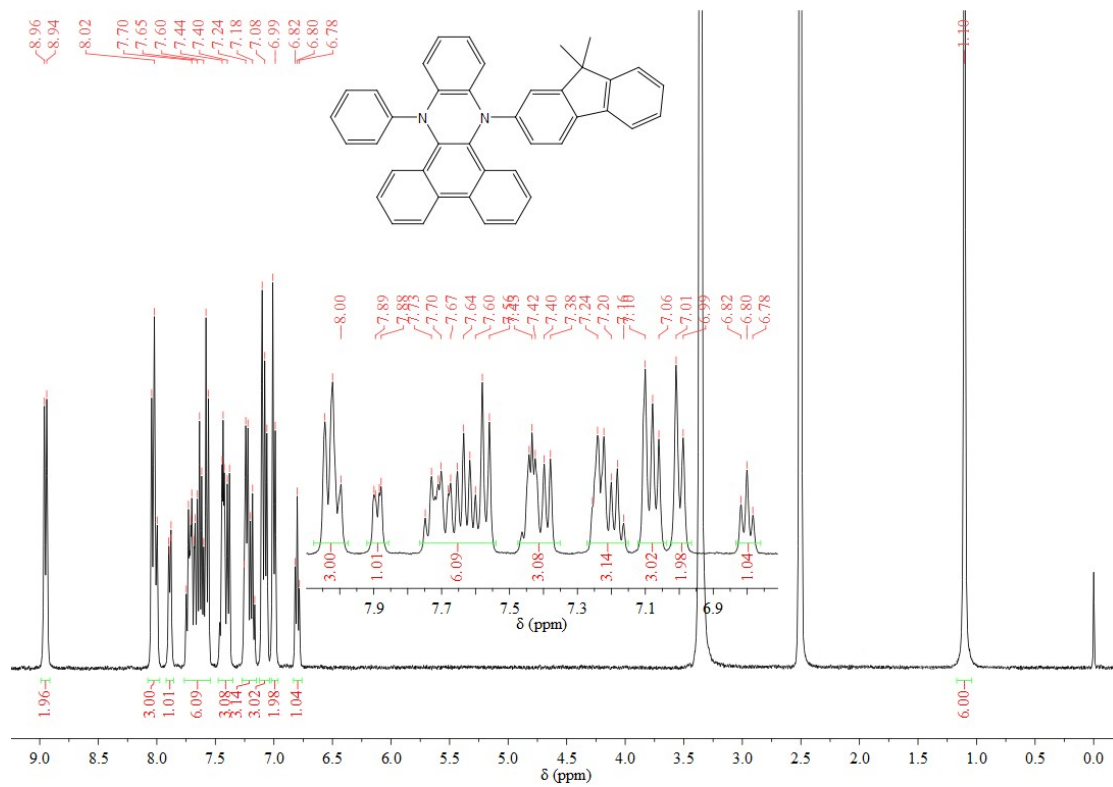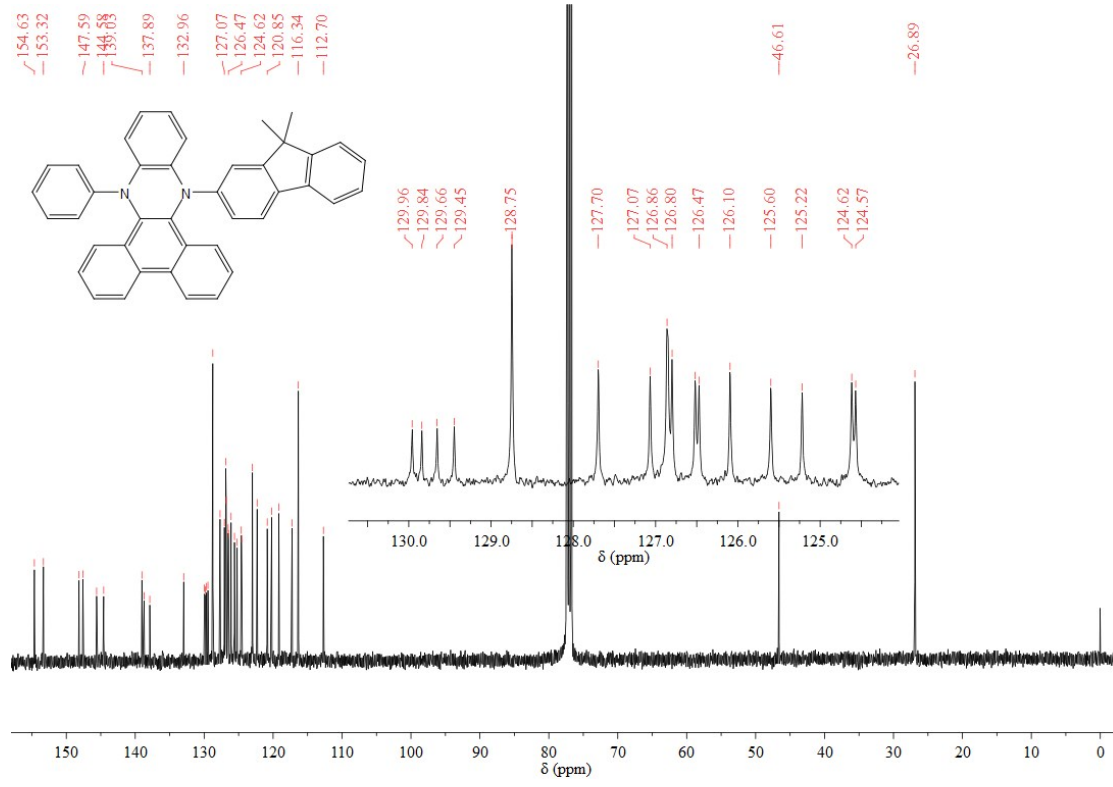

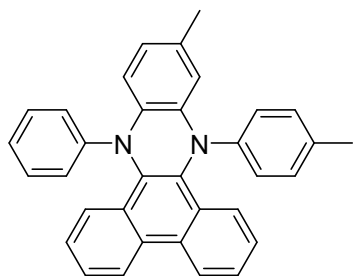

**11-methyl-14-phenyl-9-(p-tolyl)-9,14-dihydrodibenzo[a,c]phenazine (1dd)**

m.p. 254-255 °C;  $^1\text{H}$  NMR (400 MHz,  $\text{CDCl}_3$ )  $\delta$ : 8.71 (d,  $J = 8.3$  Hz, 2H), 8.06-8.15 (m, 2H), 7.47-7.64 (m, 6H), 7.10 (dd,  $J = 8.0, 1.1$  Hz, 1H), 7.01 (dd,  $J = 11.3, 4.6$  Hz, 2H), 6.89-6.96 (m, 4H), 6.82 (d,  $J = 8.4$  Hz, 2H), 6.77 (dd,  $J = 12.2, 5.0$  Hz, 1H), 2.44 (s, 3H), 2.14 (s, 3H);  $^{13}\text{C}$  NMR (100 MHz,  $\text{CDCl}_3$ )  $\delta$ : 148.25, 145.40, 145.16, 141.53, 138.40, 137.64, 135.37, 130.93, 129.96, 129.70, 129.60, 129.48, 129.40, 128.71, 127.14, 126.96, 126.82, 126.35, 126.30, 125.61, 124.62, 124.58, 122.98, 122.95, 120.50, 118.21, 116.19, 21.34, 20.49; HRMS ESI ( $m/z$ )  $[\text{M}]^+$ : calcd. for  $\text{C}_{34}\text{H}_{26}\text{N}_2$  462.2096, found 462.2090.

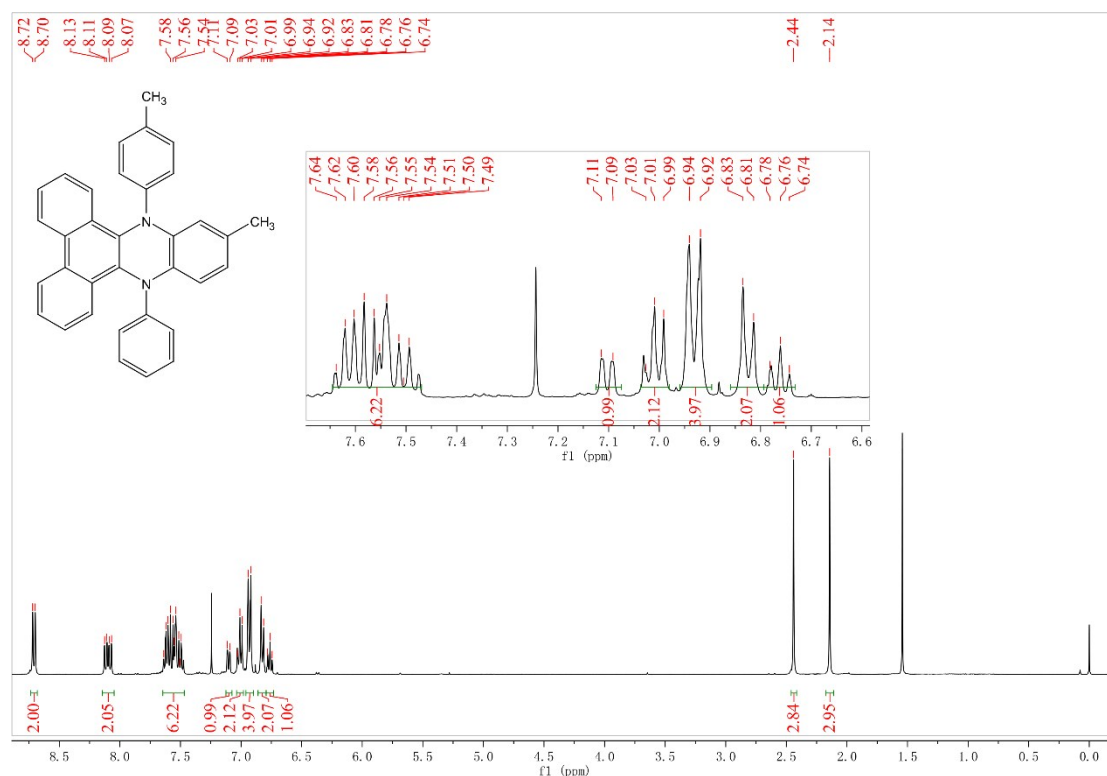

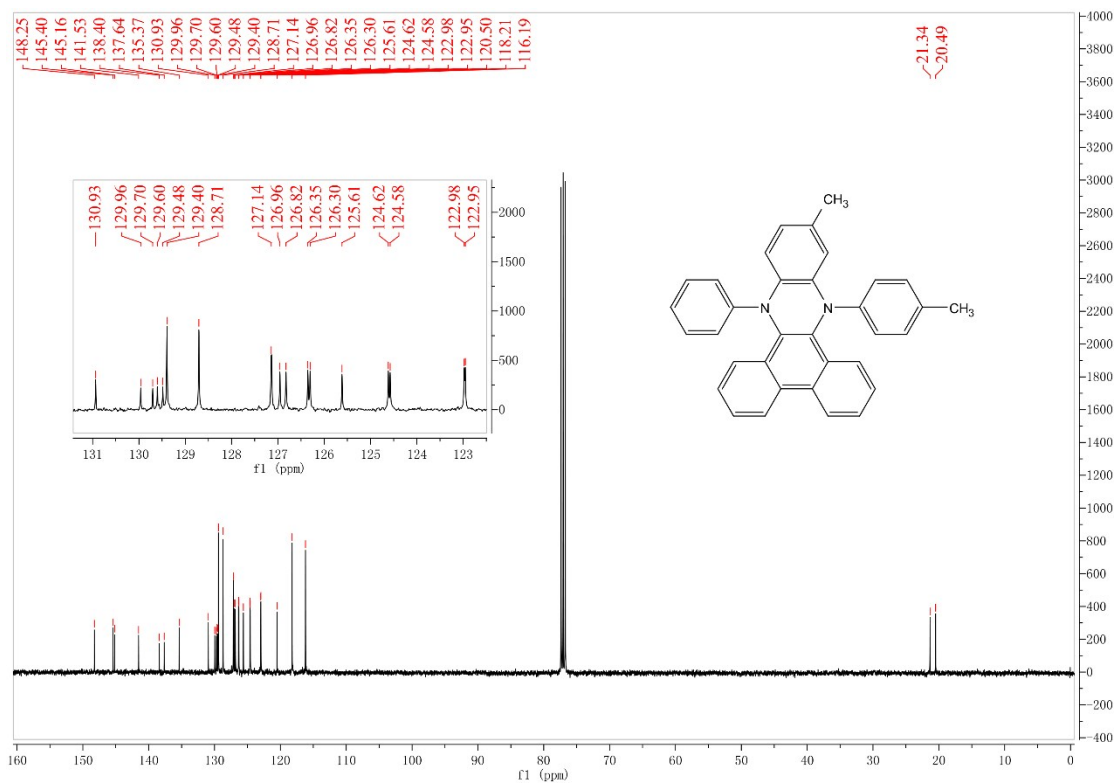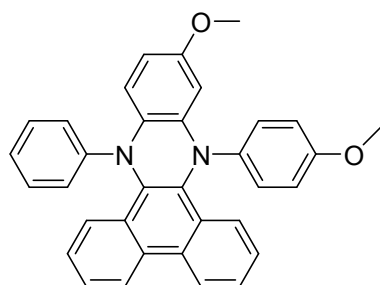

**11-methoxy-9-(4-methoxyphenyl)-14-phenyl-9,14-dihydrodibenzo[a,c]phenazine (1ed)**

m.p. 226-228 °C; <sup>1</sup>H NMR (400 MHz, DMSO) δ: 8.91 (d, *J* = 8.3 Hz, 2H), 7.99 (dd, *J* = 16.5, 8.0 Hz, 2H), 7.61-7.72 (m, 4H), 7.54 (t, *J* = 7.6 Hz, 1H), 7.41 (s, 1H), 7.16 (d, *J* = 8.9 Hz, 2H), 7.09 (t, *J* = 7.8 Hz, 2H), 6.93 (d, *J* = 8.8 Hz, 1H), 6.87 (d, *J* = 8.1 Hz, 2H), 6.81 (t, *J* = 7.3 Hz, 1H), 6.70 (d, *J* = 8.9 Hz, 2H), 3.85 (s, 3H), 3.61 (s, 3H); <sup>13</sup>C NMR (100 MHz, CDCl<sub>3</sub>) δ: 157.63, 155.45, 149.22, 146.97, 141.34, 138.53, 136.93, 136.28, 130.12, 129.73, 129.51, 129.27, 128.71, 128.06, 127.08, 126.71, 126.29, 126.23, 124.53, 124.48, 123.01, 122.90, 122.06, 120.31, 115.77, 114.24, 111.22, 109.68, 55.77, 55.40; HRMS ESI (*m/z*) [*M*+H]<sup>+</sup>: calcd. for C<sub>34</sub>H<sub>27</sub>N<sub>2</sub>O<sub>2</sub> 495.2073, found 495.2075.

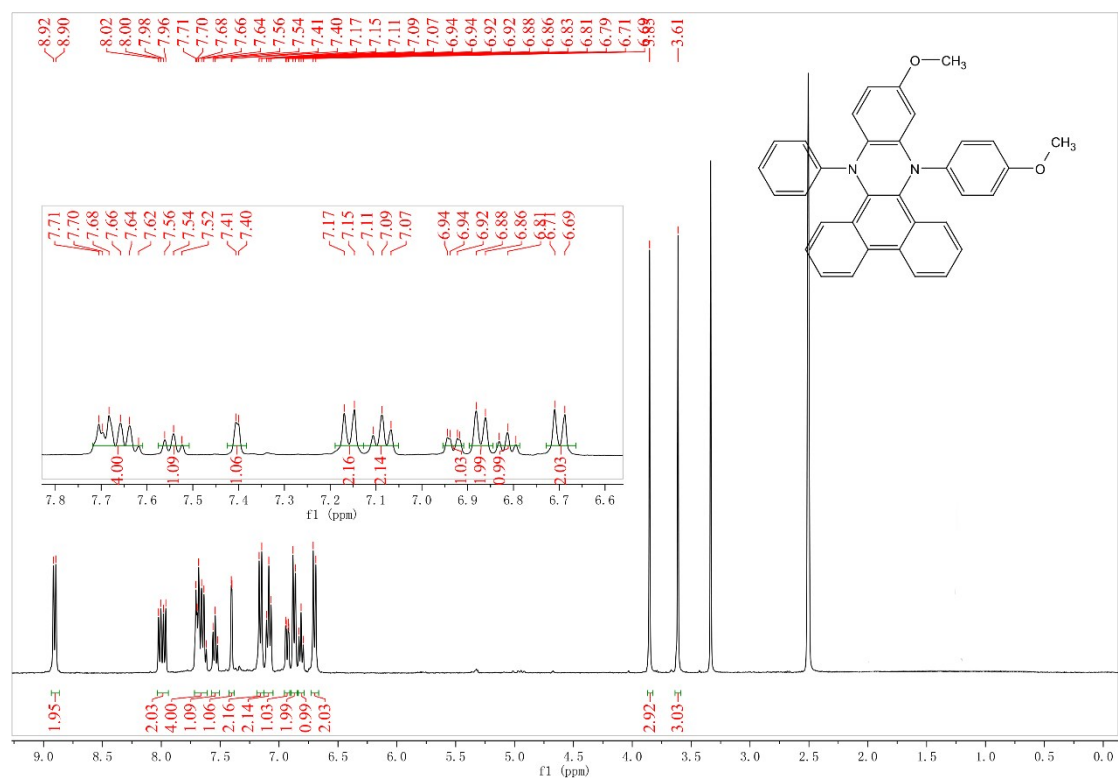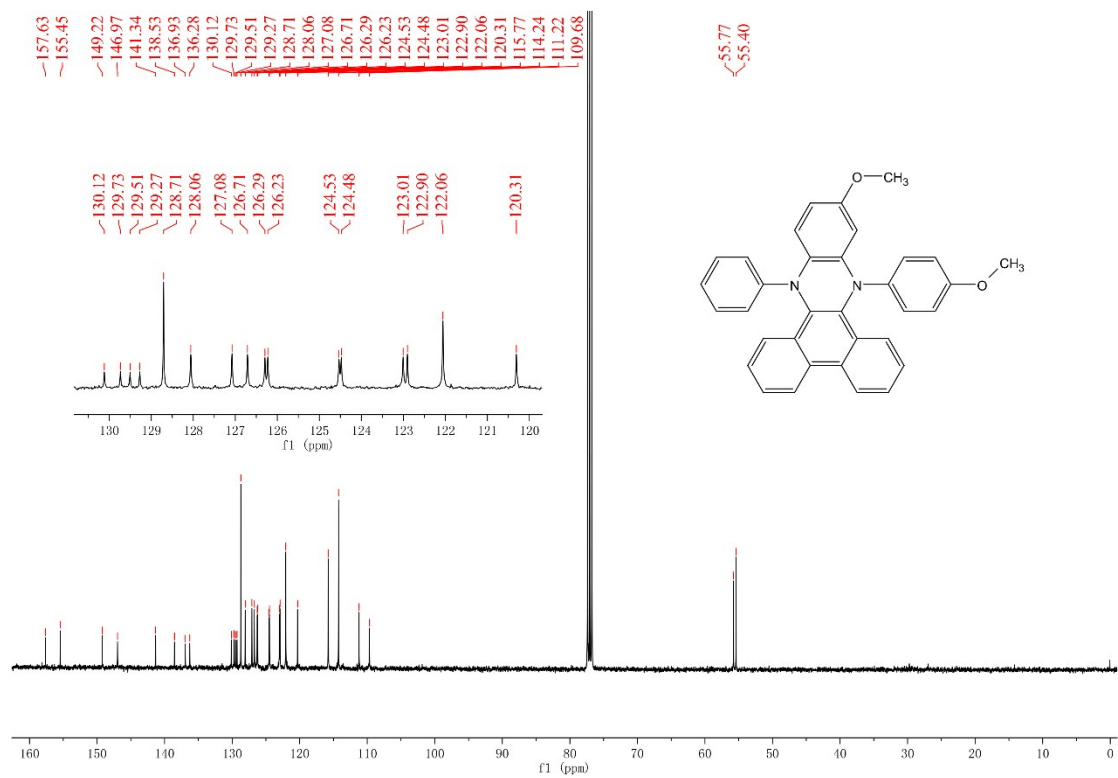

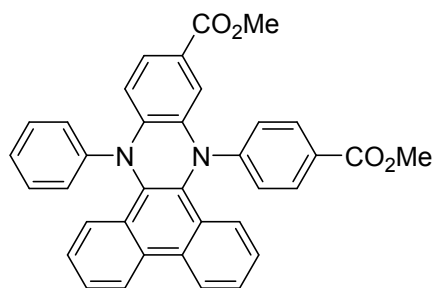

**methyl** **9-(4-(methoxycarbonyl)phenyl)-14-phenyl-9,14-dihydrodibenzo[a,c]phenazine-11-carboxylate (1fd)**

m.p. 271-272 °C;  $^1\text{H}$  NMR (400 MHz, DMSO)  $\delta$ : 8.97 (d,  $J = 8.3$  Hz, 2H), 8.40 (d,  $J = 1.9$  Hz, 1H), 8.15 (d,  $J = 8.4$  Hz, 1H), 8.03-8.08 (m, 2H), 7.89-7.94 (m, 1H), 7.72-7.76 (m, 2H), 7.67-7.71 (m, 3H), 7.57-7.60 (t,  $J = 7.6$  Hz, 1H), 7.13-7.20 (m, 4H), 6.89-6.97 (m, 3H), 3.92 (s, 3H), 3.72 (s, 3H);  $^{13}\text{C}$  NMR (100 MHz,  $\text{CDCl}_3$ )  $\delta$ : 166.88, 166.31, 151.13, 149.83, 146.36, 142.61, 137.98, 136.12, 130.86, 130.34, 129.84, 129.20, 128.95, 128.75, 128.74, 127.84, 127.43, 127.06, 127.02, 126.99, 126.94, 125.96, 124.64, 124.16, 123.20, 122.83, 122.18, 118.76, 114.40, 52.44, 51.74; HRMS ESI (m/z)  $[\text{M}+\text{H}]^+$ : calcd. for  $\text{C}_{36}\text{H}_{27}\text{N}_2\text{O}_4$  551.1971, found 551.1970.

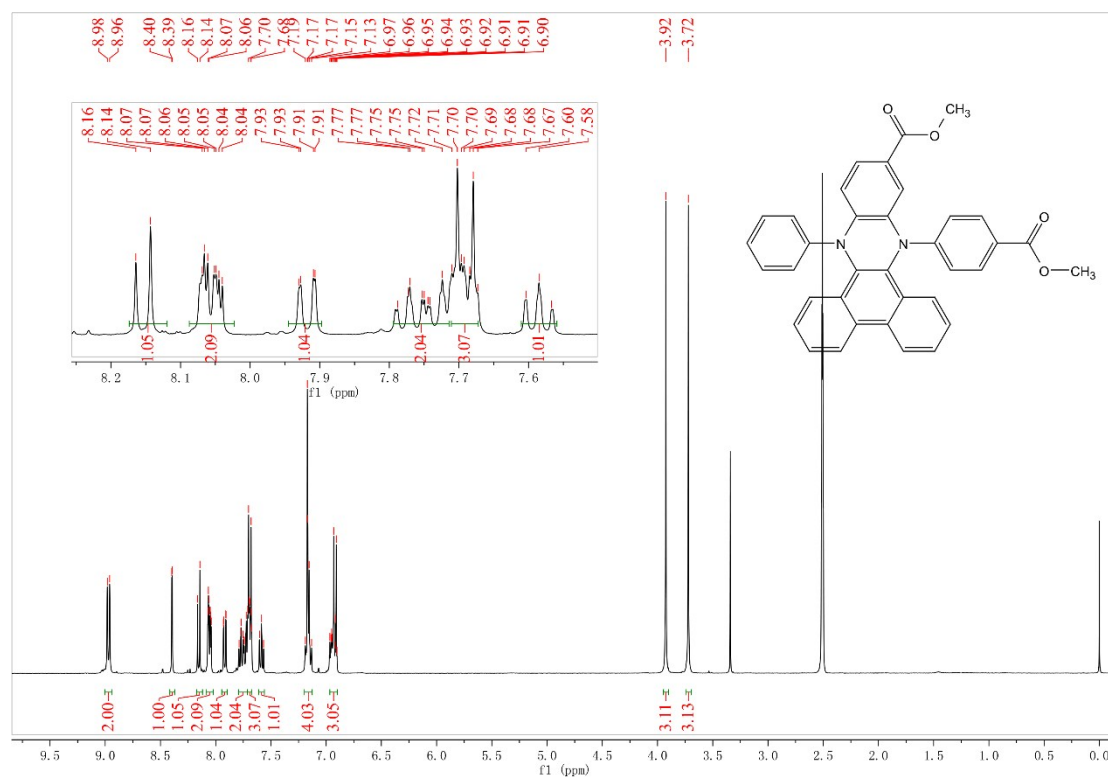

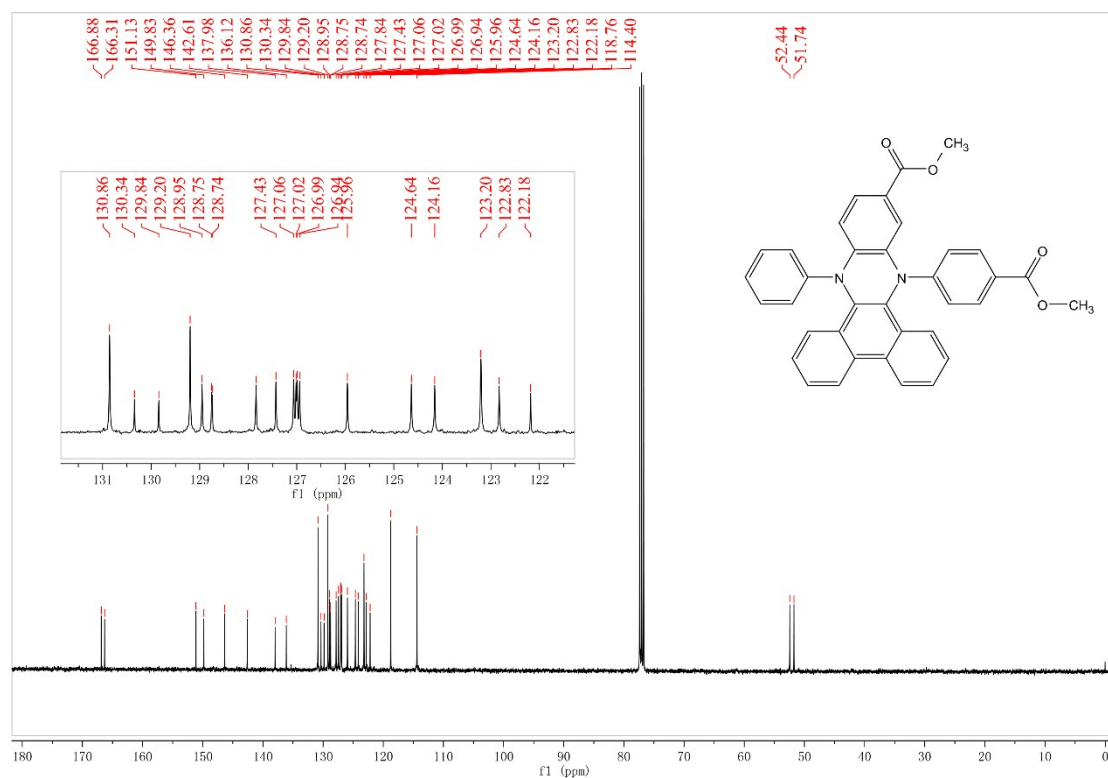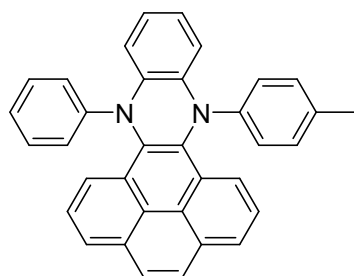

**11-methyl-9,14-diphenyl-9,14-dihydrophenanthro[4,5-abc]phenazine (1ca)**

m.p. 221-224 °C; <sup>1</sup>H NMR (400 MHz, CDCl<sub>3</sub>) δ: 8.36 (dd, *J* = 15.9, 7.7 Hz, 2H), 8.16 (t, *J* = 6.8 Hz, 2H), 8.09 (s, 2H), 8.01-7.86 (m, 2H), 7.85-7.67 (m, 2H), 7.39-7.28 (m, 2H), 7.13-6.96 (m, 6H), 6.92-6.75 (m, 3H), 2.17 (s, 3H); <sup>13</sup>C NMR (100 MHz, CDCl<sub>3</sub>) δ: 148.19, 145.46, 145.16, 143.94, 138.84, 137.88, 131.31, 131.28, 129.43, 128.75, 128.35, 128.23, 127.38, 127.34, 127.21, 126.27, 126.07, 125.93, 125.41, 125.10, 125.00, 124.88, 123.98, 123.73, 121.86, 121.69, 120.96, 118.76, 116.90, 20.45; HRMS ESI (*m/z*) [*M*+*H*]<sup>+</sup>: calcd. for C<sub>35</sub>H<sub>25</sub>N<sub>2</sub> 473.2018, found 473.2021.

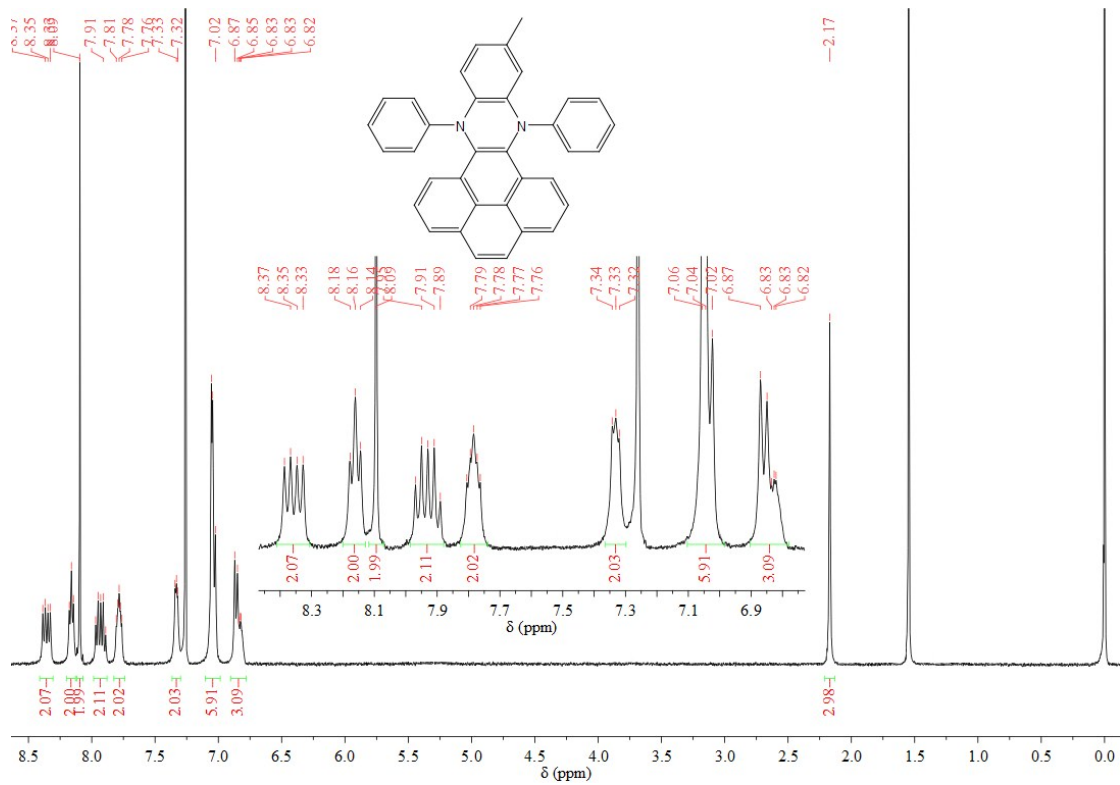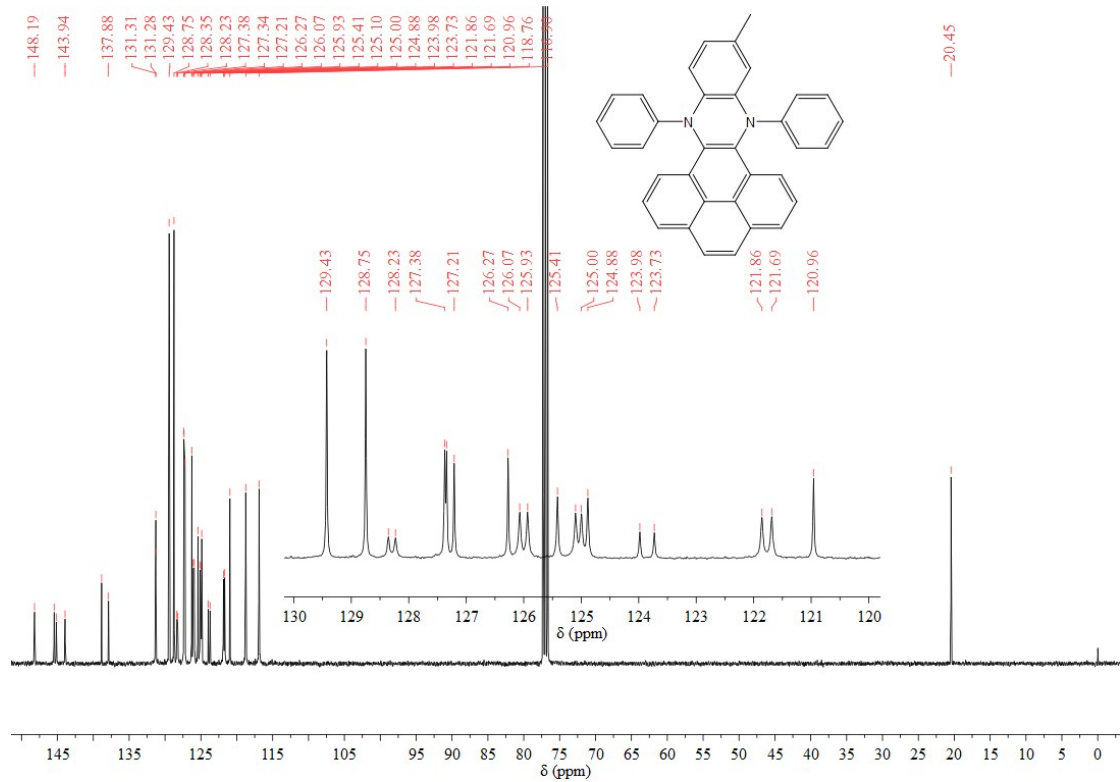

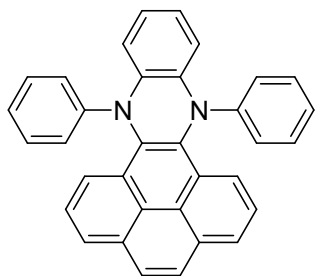

**9,14-diphenyl-9,14-dihydrophenanthro[4,5-abc]phenazine (1cc)**

m.p. 240-241 °C;  $^1\text{H}$  NMR (400 MHz,  $\text{CDCl}_3$ )  $\delta$ : 8.37 (d,  $J = 7.8$  Hz, 2H), 8.18 (d,  $J = 7.5$  Hz, 2H), 8.10 (s, 2H), 7.94 (t,  $J = 7.8$  Hz, 2H), 7.86-7.74 (m, 2H), 7.36 (dd,  $J = 5.9, 3.4$  Hz, 2H), 7.12-6.98 (m, 8H), 6.81 (t,  $J = 6.8$  Hz, 2H);  $^{13}\text{C}$  NMR (125 MHz,  $\text{CDCl}_3$ )  $\delta$ : 147.90, 144.75, 138.77, 131.44, 128.81, 128.38, 127.47, 127.18, 126.13, 125.37, 125.25, 123.95, 121.87, 121.29, 117.35; HRMS ESI ( $m/z$ )  $[\text{M}+\text{H}]^+$ : calcd. for  $\text{C}_{34}\text{H}_{23}\text{N}_2$  459.1861, found 459.1861.

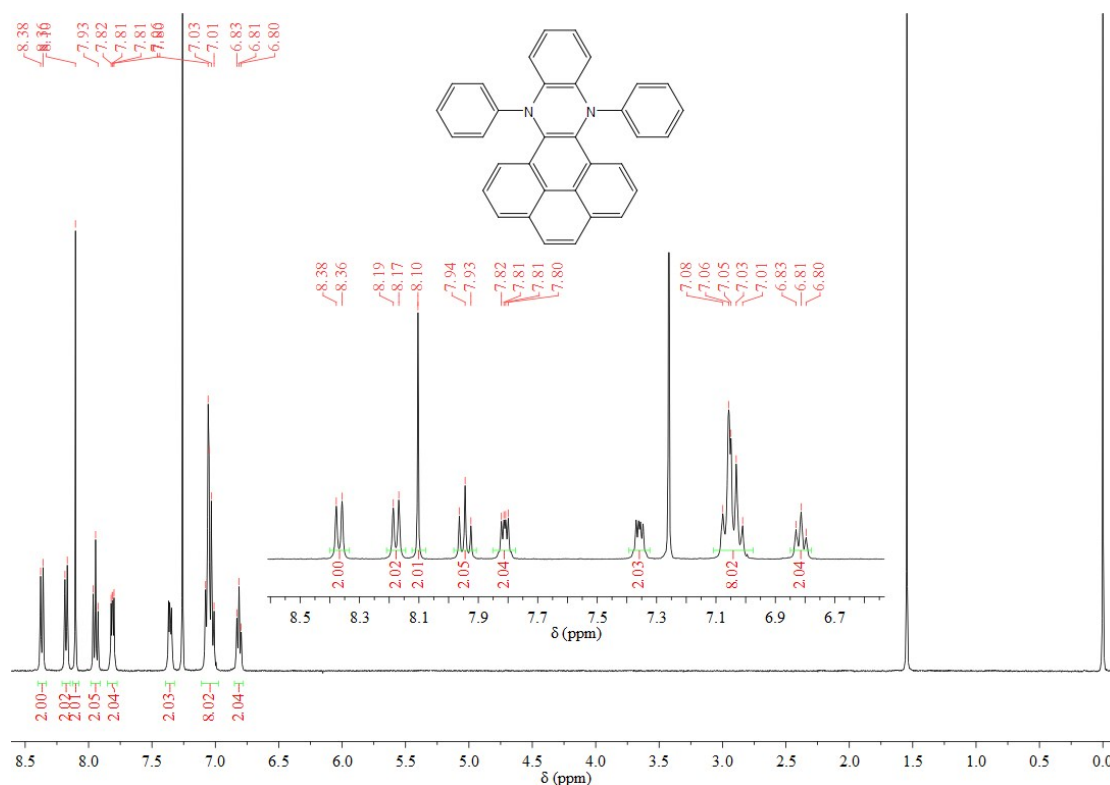



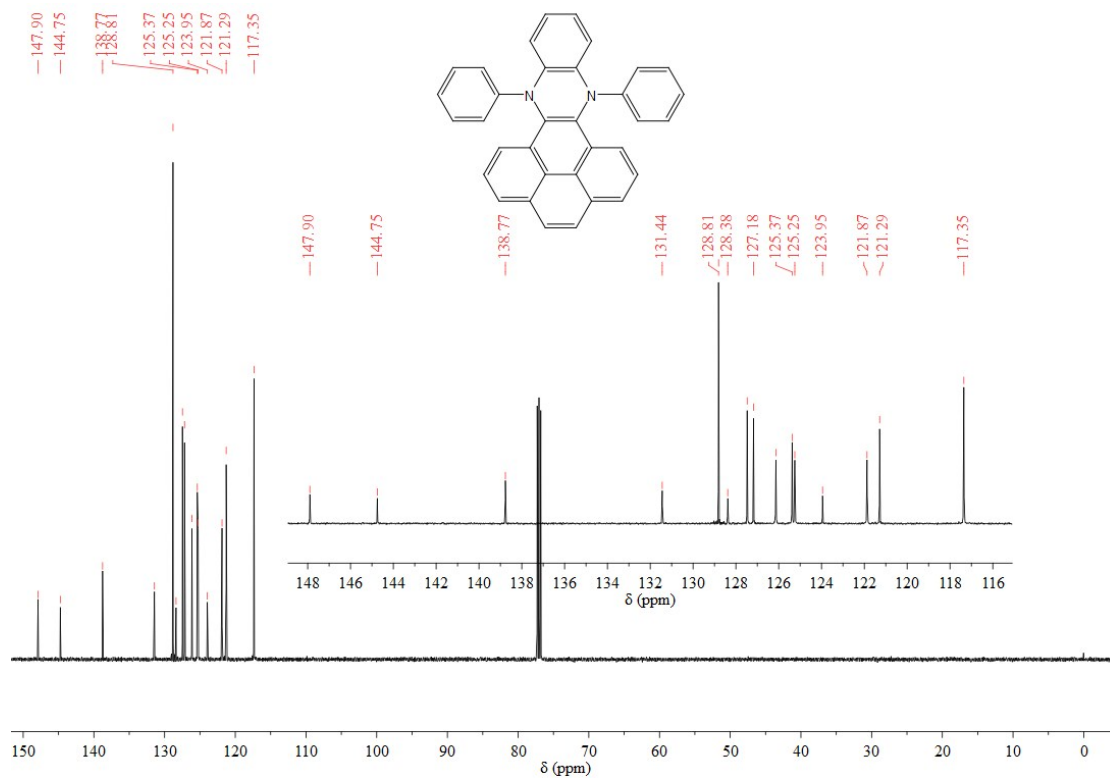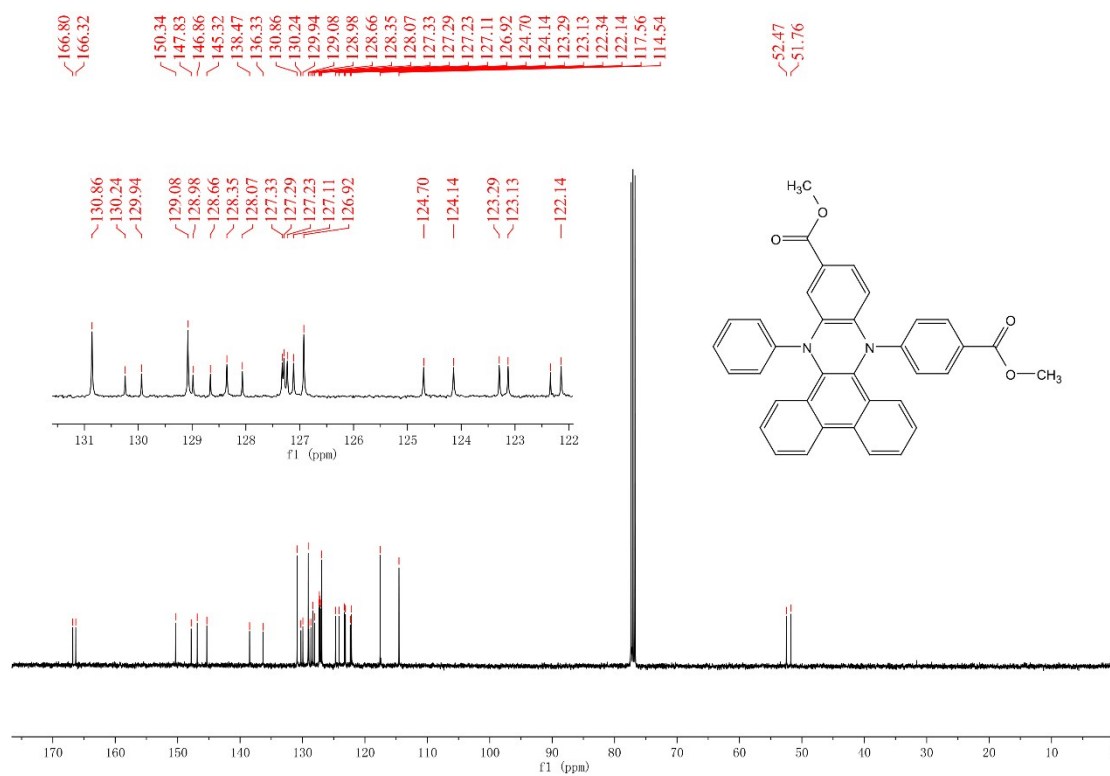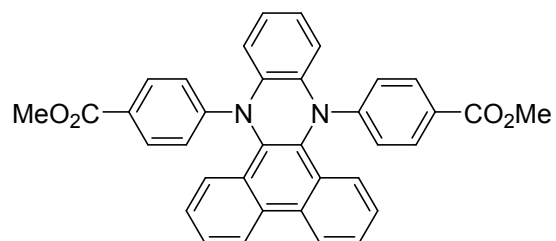

**dimethyl 4,4'-(dibenzo[a,c]phenazine-9,14-diyl)dibenzoate (1cc-2)**

$^1\text{H}$  NMR (400 MHz, DMSO)  $\delta$ : 9.01 (d,  $J = 8.3$  Hz, 2H), 8.02 (dt,  $J = 7.3, 3.7$  Hz, 2H), 7.94-7.98 (m, 2H), 7.77-7.82 (m, 2H), 7.69 (t,  $J = 7.4$  Hz, 2H), 7.64 (d,  $J = 9.0$  Hz, 4H), 7.54 (dd,  $J = 5.9, 3.4$  Hz, 2H), 6.97 (d,  $J = 9.0$  Hz, 4H), 3.70 (s, 6H);  $^{13}\text{C}$  NMR (101 MHz,  $\text{CDCl}_3$ )  $\delta$  166.83, 150.43, 144.06, 138.06, 130.85, 130.05, 128.76, 128.08, 127.38, 127.26, 126.27, 124.47, 123.32, 122.04, 114.25, 51.74; HRMS ESI (m/z)  $[\text{M}+\text{H}]^+$ : calcd. for  $\text{C}_{36}\text{H}_{27}\text{N}_2\text{O}_4$  551.1971, found 551.1840.

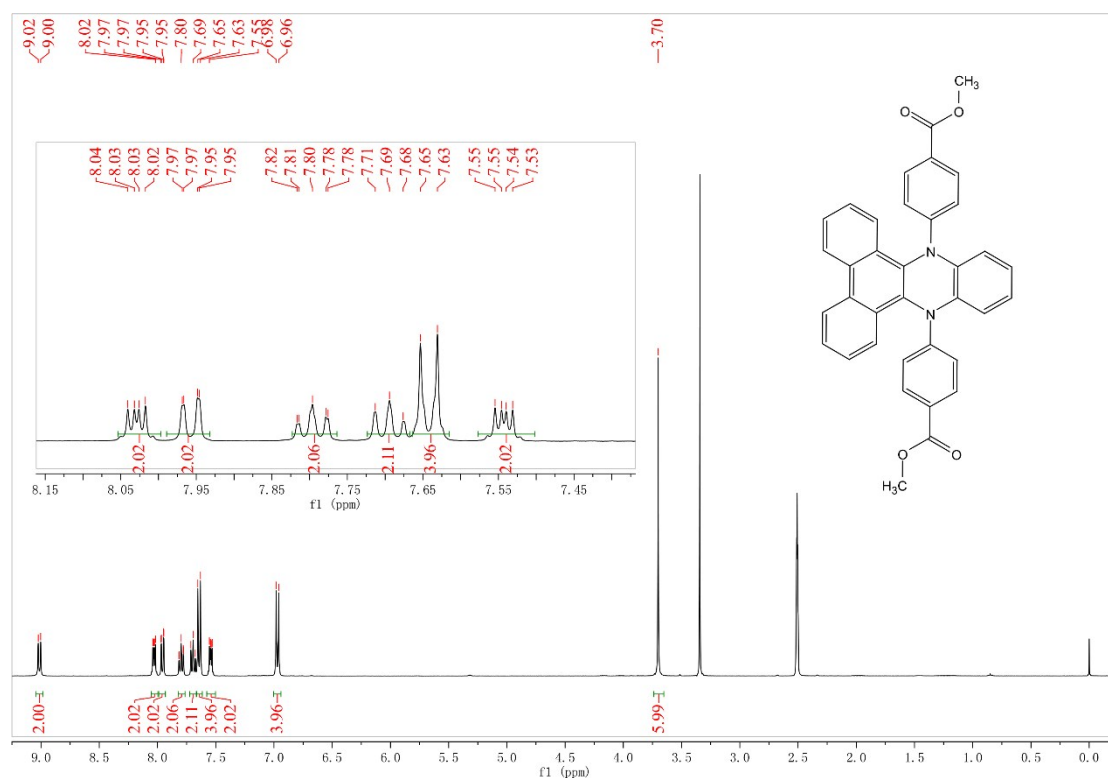

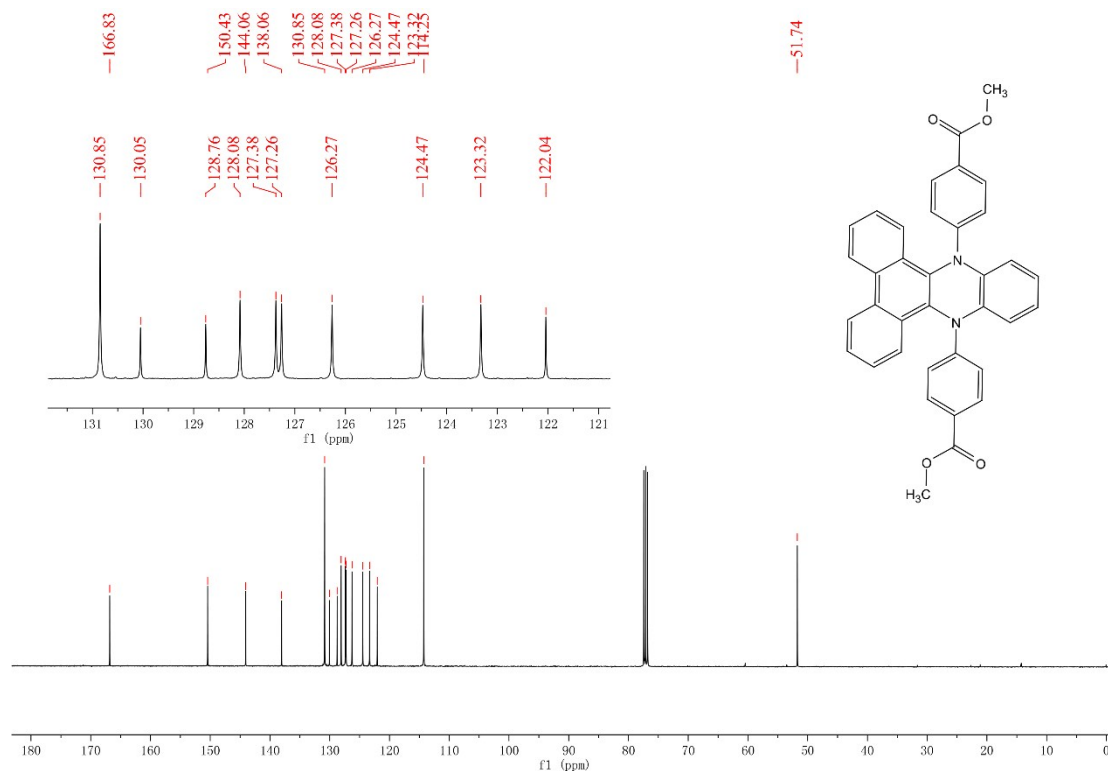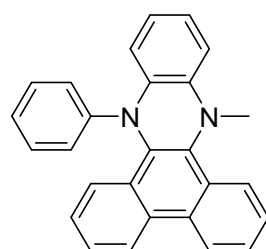

#### 9-methyl-14-phenyl-9,14-dihydrodibenzo[a,c]phenazine (4)

m.p. 212-213 °C;  $^1\text{H}$  NMR (400 MHz, DMSO)  $\delta$ : 8.91 (dd,  $J = 6.8, 2.7$  Hz, 1H), 8.82 (d,  $J = 7.7$  Hz, 1H), 8.26-8.31 (m, 1H), 7.96 (dd,  $J = 8.0, 1.3$  Hz, 1H), 7.74 (m, 2H), 7.67 (dd,  $J = 7.8, 1.3$  Hz, 1H), 7.50-7.60 (m, 2H), 7.35 (dd,  $J = 7.9, 1.3$  Hz, 1H), 7.26 (m, 1H), 7.13- 7.19 (m, 3H), 7.04 (d,  $J = 7.8$  Hz, 2H), 6.93 (t,  $J = 7.2$  Hz, 1H), 3.53 (s, 3H);  $^{13}\text{C}$  NMR (125 MHz,  $\text{CDCl}_3$ )  $\delta$ : 150.58, 141.65, 139.64, 133.55, 130.44, 129.42, 128.79, 127.29, 127.03, 126.82, 126.40, 126.04, 125.48, 123.95, 123.79, 123.34, 123.09, 122.74, 121.23, 117.55, 116.67, 43.71; HRMS ESI ( $m/z$ )  $[\text{M}+\text{H}]^+$ : calcd. for  $\text{C}_{37}\text{H}_{20}\text{N}_2$  373.1705, found 373.1691.

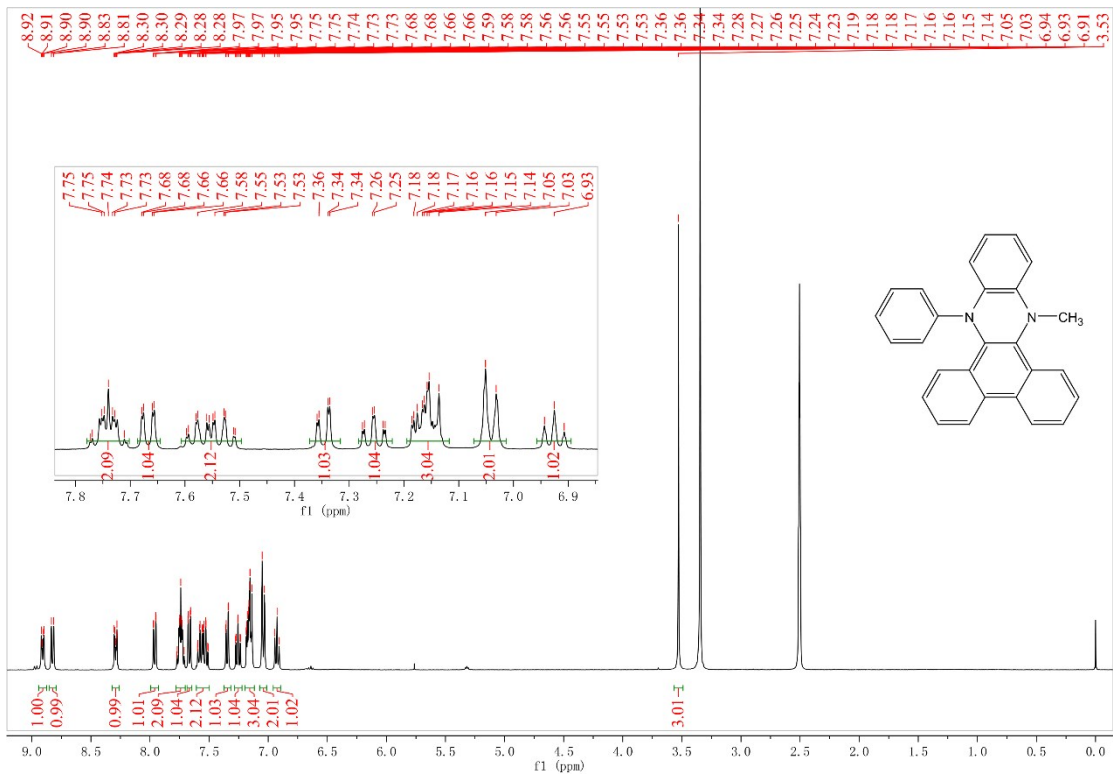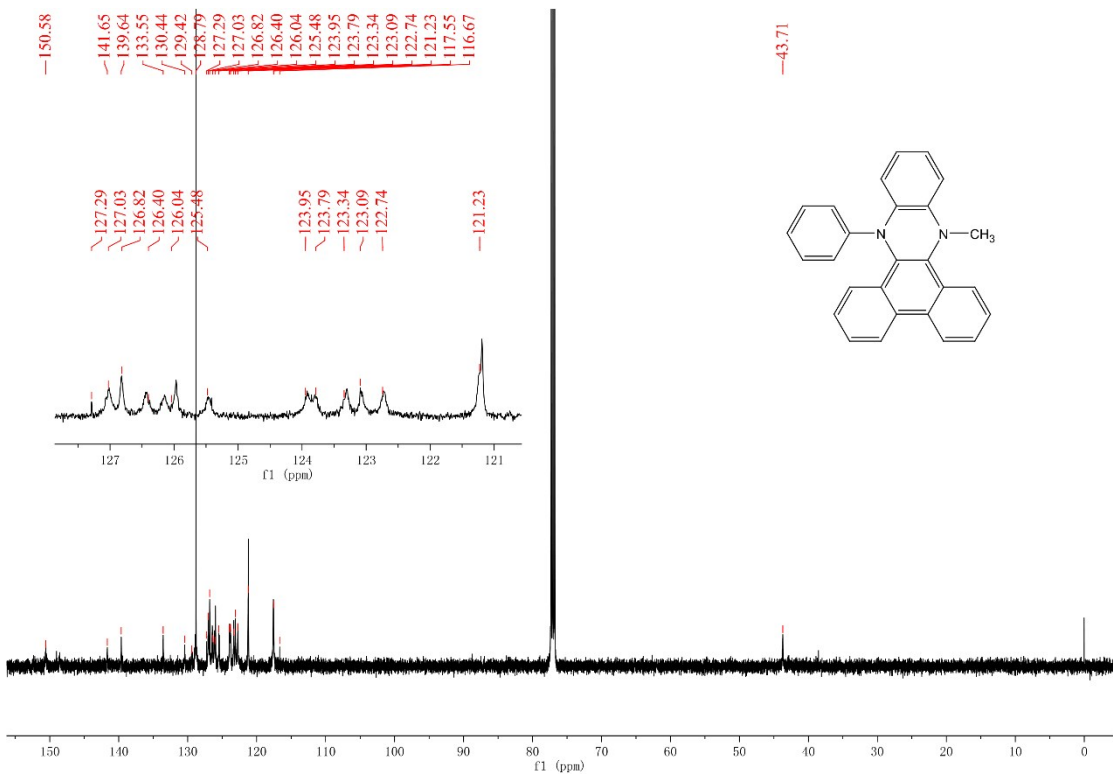

### III. The X-ray Analysis

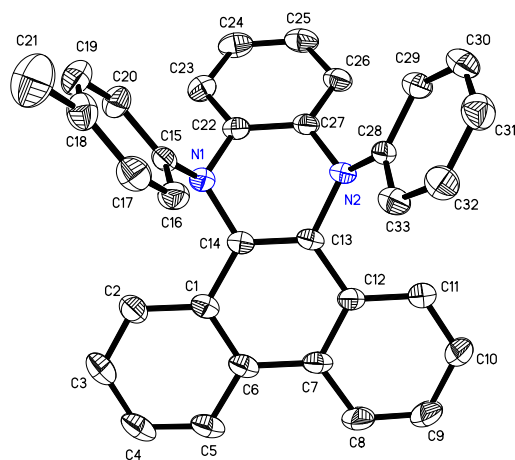

**1aa**

|                                 |                                                |                 |
|---------------------------------|------------------------------------------------|-----------------|
| Identification code             | cd15118                                        |                 |
| Empirical formula               | C <sub>33</sub> H <sub>24</sub> N <sub>2</sub> |                 |
| Formula weight                  | 448.54                                         |                 |
| Temperature                     | 293(2) K                                       |                 |
| Wavelength                      | 0.71073 Å                                      |                 |
| Crystal system                  | Monoclinic                                     |                 |
| Space group                     | P 2 <sub>1</sub> /n                            |                 |
| Unit cell dimensions            | a = 13.670(2) Å                                | α = 90°.        |
|                                 | b = 10.7087(18) Å                              | β = 98.766(4)°. |
|                                 | c = 16.477(3) Å                                | γ = 90°.        |
| Volume                          | 2384.0(7) Å <sup>3</sup>                       |                 |
| Z                               | 4                                              |                 |
| Density (calculated)            | 1.250 Mg/m <sup>3</sup>                        |                 |
| Absorption coefficient          | 0.073 mm <sup>-1</sup>                         |                 |
| F(000)                          | 944                                            |                 |
| Crystal size                    | 0.220 x 0.170 x 0.130 mm <sup>3</sup>          |                 |
| Theta range for data collection | 1.806 to 25.500°.                              |                 |
| Index ranges                    | -15 ≤ h ≤ 16, -11 ≤ k ≤ 12, -19 ≤ l ≤ 19       |                 |
| Reflections collected           | 13421                                          |                 |
| Independent reflections         | 4424 [R(int) = 0.0480]                         |                 |
| Completeness to theta = 25.242° | 100.0 %                                        |                 |
| Absorption correction           | Semi-empirical from equivalents                |                 |
| Max. and min. transmission      | 0.7456 and 0.6237                              |                 |
| Refinement method               | Full-matrix least-squares on F <sup>2</sup>    |                 |
| Data / restraints / parameters  | 4424 / 0 / 317                                 |                 |

|                                      |                                    |
|--------------------------------------|------------------------------------|
| Goodness-of-fit on $F^2$             | 1.095                              |
| Final R indices [ $I > 2\sigma(I)$ ] | R1 = 0.0653, wR2 = 0.1363          |
| R indices (all data)                 | R1 = 0.1028, wR2 = 0.1521          |
| Extinction coefficient               | n/a                                |
| Largest diff. peak and hole          | 0.264 and -0.160 e.Å <sup>-3</sup> |

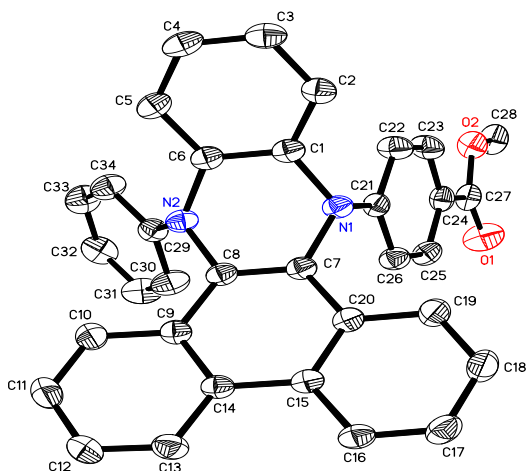

### 1ac

|                                 |                                                                                                                           |
|---------------------------------|---------------------------------------------------------------------------------------------------------------------------|
| Identification code             | cd21251                                                                                                                   |
| Empirical formula               | C34.50 H25 Cl N2 O2                                                                                                       |
| Formula weight                  | 535.02                                                                                                                    |
| Temperature                     | 293(2) K                                                                                                                  |
| Wavelength                      | 0.71073 Å                                                                                                                 |
| Crystal system, space group     | Monoclinic, C2/c                                                                                                          |
| Unit cell dimensions            | a = 15.3088(9) Å    alpha = 90 deg.<br>b = 17.9930(11) Å    beta = 92.570(2) deg.<br>c = 19.4932(12) Å    gamma = 90 deg. |
| Volume                          | 5364.0(6) Å <sup>3</sup>                                                                                                  |
| Z, Calculated density           | 8, 1.325 Mg/m <sup>3</sup>                                                                                                |
| Absorption coefficient          | 0.178 mm <sup>-1</sup>                                                                                                    |
| F(000)                          | 2232                                                                                                                      |
| Crystal size                    | 0.311 x 0.257 x 0.205 mm                                                                                                  |
| Theta range for data collection | 1.75 to 25.50 deg.                                                                                                        |
| Limiting indices                | -18 ≤ h ≤ 18, -20 ≤ k ≤ 21, -23 ≤ l ≤ 23                                                                                  |
| Reflections collected / unique  | 15604 / 5002 [R(int) = 0.0233]                                                                                            |
| Completeness to theta = 25.50   | 99.9 %                                                                                                                    |
| Absorption correction           | Empirical                                                                                                                 |
| Max. and min. transmission      | 1.00000 and 0.77314                                                                                                       |
| Refinement method               | Full-matrix least-squares on $F^2$                                                                                        |
| Data / restraints / parameters  | 5002 / 0 / 358                                                                                                            |

|                                      |                                              |
|--------------------------------------|----------------------------------------------|
| Goodness-of-fit on $F^2$             | 1.019                                        |
| Final R indices [ $I > 2\sigma(I)$ ] | $R_1 = 0.0581$ , $wR_2 = 0.1653$             |
| R indices (all data)                 | $R_1 = 0.0710$ , $wR_2 = 0.1780$             |
| Largest diff. peak and hole          | 0.491 and $-0.650 \text{ e.}\text{\AA}^{-3}$ |

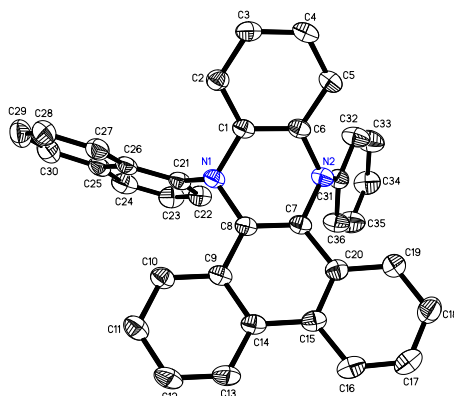

**1ag**

|                                      |                                                                                                                                                                                    |
|--------------------------------------|------------------------------------------------------------------------------------------------------------------------------------------------------------------------------------|
| Identification code                  | cd211425                                                                                                                                                                           |
| Empirical formula                    | $\text{C}_{36} \text{H}_{24} \text{N}_2$                                                                                                                                           |
| Formula weight                       | 484.57                                                                                                                                                                             |
| Temperature                          | 293(2) K                                                                                                                                                                           |
| Wavelength                           | 0.71073 $\text{\AA}$                                                                                                                                                               |
| Crystal system, space group          | Monoclinic, $C2/c$                                                                                                                                                                 |
| Unit cell dimensions                 | $a = 14.0547(18) \text{ \AA}$ $\alpha = 90 \text{ deg.}$<br>$b = 19.251(3) \text{ \AA}$ $\beta = 90.832(3) \text{ deg.}$<br>$c = 18.410(2) \text{ \AA}$ $\gamma = 90 \text{ deg.}$ |
| Volume                               | $4980.7(11) \text{ \AA}^3$                                                                                                                                                         |
| Z, Calculated density                | 8, $1.292 \text{ Mg/m}^3$                                                                                                                                                          |
| Absorption                           | $0.075 \text{ mm}^{-1}$                                                                                                                                                            |
| $F(000)$                             | 2032                                                                                                                                                                               |
| Crystal size                         | $0.309 \times 0.238 \times 0.197 \text{ mm}$                                                                                                                                       |
| Theta range for data collection      | 2.10 to 26.00 deg.                                                                                                                                                                 |
| Limiting indices                     | $-17 \leq h \leq 16$ , $-23 \leq k \leq 23$ , $-22 \leq l \leq 12$                                                                                                                 |
| Reflections collected / unique       | 13435 / 4891 [ $R(\text{int}) = 0.0210$ ]                                                                                                                                          |
| Completeness to $\theta = 26.00$     | 99.8 %                                                                                                                                                                             |
| Absorption correction                | Empirical                                                                                                                                                                          |
| Max. and min.                        | 1.00000 and 0.84202                                                                                                                                                                |
| Refinement method                    | Full-matrix least-squares on $F^2$                                                                                                                                                 |
| Data / restraints / parameters       | 4891 / 0 / 343                                                                                                                                                                     |
| Final R indices [ $I > 2\sigma(I)$ ] | $R_1 = 0.0398$ , $wR_2 = 0.1038$                                                                                                                                                   |
| R indices (all data)                 | $R_1 = 0.0549$ , $wR_2 = 0.1145$                                                                                                                                                   |
| Largest diff. peak and hole          | 0.181 and $-0.145 \text{ e.}\text{\AA}^{-3}$                                                                                                                                       |

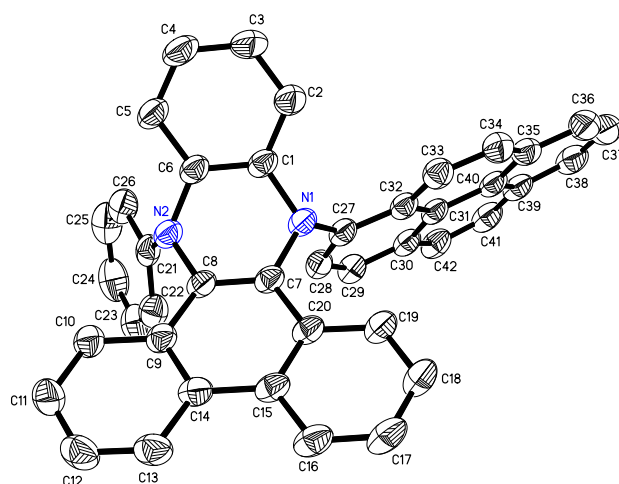

**1ai**

|                                   |                                                                                                                           |
|-----------------------------------|---------------------------------------------------------------------------------------------------------------------------|
| Identification code               | cd21252                                                                                                                   |
| Empirical formula                 | C <sub>42</sub> H <sub>26</sub> N <sub>2</sub>                                                                            |
| Formula weight                    | 558.65                                                                                                                    |
| Temperature                       | 293(2) K                                                                                                                  |
| Wavelength                        | 0.71073 Å                                                                                                                 |
| Crystal system, space group       | Monoclinic, P2(1)/n                                                                                                       |
| Unit cell dimensions              | a = 11.4684(6) Å    alpha = 90 deg.<br>b = 18.0050(9) Å    beta = 92.9890(10) deg.<br>c = 13.8450(7) Å    gamma = 90 deg. |
| Volume                            | 2854.9(3) Å <sup>3</sup>                                                                                                  |
| Z, Calculated density             | 4, 1.300 Mg/m <sup>3</sup>                                                                                                |
| Absorption coefficient            | 0.075 mm <sup>-1</sup>                                                                                                    |
| F(000)                            | 1168                                                                                                                      |
| Crystal size                      | 0.321 x 0.212 x 0.156 mm                                                                                                  |
| Theta range for data collection   | 1.86 to 26.00 deg.                                                                                                        |
| Limiting indices                  | -14 ≤ h ≤ 13, -22 ≤ k ≤ 16, -17 ≤ l ≤ 17                                                                                  |
| Reflections collected / unique    | 17144 / 5607 [R(int) = 0.0235]                                                                                            |
| Completeness to theta = 26.00     | 99.9 %                                                                                                                    |
| Absorption correction             | Empirical                                                                                                                 |
| Max. and min. transmission        | 1.00000 and 0.58903                                                                                                       |
| Refinement method                 | Full-matrix least-squares on F <sup>2</sup>                                                                               |
| Data / restraints / parameters    | 5607 / 6 / 397                                                                                                            |
| Goodness-of-fit on F <sup>2</sup> | 1.023                                                                                                                     |
| Final R indices [I > 2σ(I)]       | R1 = 0.0486, wR2 = 0.1257                                                                                                 |
| R indices (all data)              | R1 = 0.0703, wR2 = 0.1407                                                                                                 |
| Largest diff. peak and hole       | 0.163 and -0.122 e.Å <sup>-3</sup>                                                                                        |
